# Supplementary material
Source: PubMed Central journal article supplement (PMC6778458)
Supplement: kay055_suppl_supplementary_results.pdf [file kay055_suppl_supplementary_results.pdf]

# No evidence of “healthy neuroticism” in the Hawaii Personality and Health Cohort : Analysis Code and Results

First Author<sup>1</sup>, Second Author<sup>2</sup>

```
rm(list=ls())
knitr::opts_chunk$set(echo = TRUE)
options(width=120)
```

## 1 Environment

### 1.1 Packages

```
library(knitr)
library(haven)
library(foreign)
library(tidyverse)
library(stargazer)
library(MASS)
library(lavaan)
library(psych)
library(memisc)
library(kutils)
library(sjPlot)

set.seed(1959)
```

```
sessionInfo()

## R version 3.4.2 (2017-09-28)
## Platform: x86_64-apple-darwin15.6.0 (64-bit)
## Running under: macOS High Sierra 10.13.2
##
## Matrix products: default
## BLAS: /Library/Frameworks/R.framework/Versions/3.4/Resources/lib/libRblas.0.dylib
## LAPACK: /Library/Frameworks/R.framework/Versions/3.4/Resources/lib/libRlapack.dylib
##
## locale:
## [1] en_US.UTF-8/en_US.UTF-8/en_US.UTF-8/C/en_US.UTF-8/en_US.UTF-8
##
## attached base packages:
## [1] stats      graphics  grDevices  utils      datasets  methods   base
##
## other attached packages:
## [1] sjPlot_2.4.0      kutils_1.0      memisc_0.99.8   lattice_0.20-35  psych_1.7.8     lavaan_0.5-23.1097
## [7] MASS_7.3-47      stargazer_5.2   dplyr_0.7.4     purrr_0.2.4      readr_1.1.1     tidyr_0.7.1
## [13] tibble_1.3.3     ggplot2_2.2.1  tidyverse_1.1.1  foreign_0.8-69   haven_1.1.0     knitr_1.17
##
## loaded via a namespace (and not attached):
## [1] nlme_3.1-131      pbkrtest_0.4-7  lubridate_1.6.0  httr_1.2.1      TMB_1.7.11      tools_3.4.2
## [7] DT_0.2           R6_2.2.2       sjlabelled_1.0.4 lazyeval_0.2.1  mgcv_1.8-20     colorspace_1.3-2
## [13] nnet_7.3-12     tidyselect_0.1.1  mnormt_1.5-5    compiler_3.4.2  rvest_0.3.2     quantreg_5.33
## [19] SparseM_1.77    xml2_1.1.1     sandwich_2.3-4  effects_4.0-0   scales_0.5.0    lmtest_0.9-35
## [25] mvtnorm_1.0-6   quadprog_1.5-5  blme_1.0-4      digest_0.6.12  stringr_1.2.0   pbivnorm_0.6.0
## [31] minqa_1.2.4     stringdist_0.9.4.4  htmltools_0.3.6  pkgconfig_2.0.1  lme4_1.1-13     highr_0.6
```

<sup>1</sup> First Institution.

<sup>2</sup> Second Institution.

```
## [37] htmlwidgets_0.9      pwr_1.2-1      rlang_0.1.4    readxl_1.0.0   shiny_1.0.3    bindr_0.1
## [43] zoo_1.8-0          jsonlite_1.5   car_2.1-5      magrittr_1.5   modeltools_0.2-21 bayesplot_1.4.0
## [49] Matrix_1.2-11      Rcpp_0.12.13  munsell_0.4.3  abind_1.4-5    prediction_0.2.0 merTools_0.3.0
## [55] stringi_1.1.5      multcomp_1.4-6 snakecase_0.5.1 carData_3.0-0   plyr_1.8.4     grid_3.4.2
## [61] parallel_3.4.2     sjmisc_2.6.1  forcats_0.2.0  ggeffects_0.2.2 splines_3.4.2   sjstats_0.12.0
## [67] hms_0.3            codetools_0.2-15 reshape2_1.4.2 stats4_3.4.2   glue_1.1.1     evaluate_0.10.1
## [73] modelr_0.1.0       httpuv_1.3.5  nlptr_1.0.4    MatrixModels_0.4-1 cellranger_1.1.0 gtable_0.2.0
## [79] assertthat_0.2.0  openxlsx_4.0.17 mime_0.5        coin_1.2-0     xtable_1.8-2   broom_0.4.2
## [85] survey_3.32-1     coda_0.19-1   survival_2.41-3 arm_1.9-3      glmmTMB_0.1.1  bindrcpp_0.2
## [91] TH.data_1.0-8
```

## 1.2 Load data

We load in the data, which is stored as an Rdata file. This contains a data frame of the variables of interest and a vector of the personality items text.

```
load("HealthyNData.Rdata")
```

## 2 Trait measures

We create a list which identifies which items load onto which personality scales and in what direction.

```
adult.personality.list <- list(
  Extra = c("PQ2", "PQ32", "-PQ62", "-PQ92",
            "PQ7", "PQ37", "-PQ67", "-PQ97",
            "PQ12", "PQ42", "PQ72", "-PQ102",
            "PQ17", "PQ47", "PQ77", "-PQ107",
            "PQ22", "PQ52", "PQ82", "PQ112",
            "PQ27", "PQ57", "PQ87", "PQ117"),
  Agree = c("PQ4", "PQ34", "PQ64", "-PQ94",
            "-PQ9", "-PQ39", "-PQ69", "-PQ99",
            "PQ14", "PQ44", "-PQ74", "-PQ104",
            "-PQ19", "-PQ49", "-PQ79", "-PQ109",
            "-PQ24", "-PQ54", "-PQ84", "-PQ114",
            "PQ29", "PQ59", "-PQ89", "-PQ119"),
  Con = c("PQ5", "PQ35", "PQ65", "PQ95",
            "PQ10", "-PQ40", "-PQ70", "-PQ100",
            "PQ15", "PQ45", "-PQ75", "-PQ105",
            "PQ20", "PQ50", "-PQ80", "-PQ110",
            "PQ25", "PQ55", "-PQ85", "-PQ115",
            "-PQ30", "-PQ60", "-PQ90", "-PQ120"),
  Neur = c("PQ1", "PQ31", "PQ61", "PQ91",
            "PQ6", "PQ36", "PQ66", "-PQ96",
            "PQ11", "PQ41", "PQ71", "-PQ101",
            "PQ16", "PQ46", "PQ76", "-PQ106",
            "PQ21", "-PQ51", "-PQ81", "-PQ111",
            "PQ26", "PQ56", "PQ86", "-PQ116"),
  Open = c("PQ3", "PQ33", "PQ63", "PQ93",
            "PQ8", "PQ38", "-PQ68", "-PQ98",
            "PQ13", "PQ43", "-PQ73", "-PQ103",
            "PQ18", "-PQ48", "-PQ78", "-PQ108",
            "PQ23", "-PQ53", "-PQ83", "-PQ113",
            "PQ28", "PQ58", "-PQ88", "-PQ118"))
```

Only neuroticism and conscientiousness will be used in the analyses. However, we will score all the Big Five traits. This allows for easy inspection of neuroticism and conscientiousness, as it allows us to compare the reliabilities to these other measures and to confirm that the traits are negatively correlated with neuroticism and positively correlated with conscientiousness, as in other studies.

We present descriptive statistics of the neuroticism and conscientiousness items in Tables 1 and 2.

```
n.desc <- describe(ori.health[,gsub("-", "", adult.personality.list$Neur)], fast=T)
rownames(n.desc) <- personality.text[gsub("-", "", adult.personality.list$Neur)]

stargazer(n.desc, rownames = T, title="Descriptives of adult neuroticism items",
          summary=F, label="tab.neuritems", font.size = "small", out="tables/NDescribe.tex")
```

|                                                | vars | n   | mean  | sd    | min | max | range | se    |
|------------------------------------------------|------|-----|-------|-------|-----|-----|-------|-------|
| Worry about things                             | 1    | 796 | 3.643 | 1.075 | 1   | 5   | 4     | 0.038 |
| Fear for the worst                             | 2    | 795 | 2.771 | 1.152 | 1   | 5   | 4     | 0.041 |
| Am afraid of many things                       | 3    | 796 | 2.202 | 1.013 | 1   | 5   | 4     | 0.036 |
| Get stressed out easily                        | 4    | 796 | 2.595 | 1.091 | 1   | 5   | 4     | 0.039 |
| Get angry easily                               | 5    | 794 | 2.685 | 1.093 | 1   | 5   | 4     | 0.039 |
| Get irritated easily                           | 6    | 795 | 2.840 | 1.100 | 1   | 5   | 4     | 0.039 |
| Lose my temper                                 | 7    | 795 | 2.364 | 1.072 | 1   | 5   | 4     | 0.038 |
| Am not easily annoyed                          | 8    | 795 | 3.333 | 0.963 | 1   | 5   | 4     | 0.034 |
| Often feel blue                                | 9    | 793 | 2.247 | 1.171 | 1   | 5   | 4     | 0.042 |
| Dislike myself                                 | 10   | 795 | 1.950 | 1.024 | 1   | 5   | 4     | 0.036 |
| Am often "down in the dumps"                   | 11   | 796 | 2.039 | 1.011 | 1   | 5   | 4     | 0.036 |
| Feel comfortable with myself                   | 12   | 795 | 4.011 | 0.938 | 1   | 5   | 4     | 0.033 |
| Find it difficult to approach others           | 13   | 794 | 2.709 | 1.163 | 1   | 5   | 4     | 0.041 |
| Am afraid to draw attention to myself          | 14   | 795 | 3.289 | 1.055 | 1   | 5   | 4     | 0.037 |
| Only feel comfortable with friends             | 15   | 795 | 2.819 | 1.146 | 1   | 5   | 4     | 0.041 |
| Am not bothered by difficult social situations | 16   | 794 | 2.877 | 1.112 | 1   | 5   | 4     | 0.039 |
| Go on binges (overeating, gambling, etc.)      | 17   | 795 | 2.196 | 1.223 | 1   | 5   | 4     | 0.043 |
| Rarely overindulge                             | 18   | 791 | 3.255 | 1.028 | 1   | 5   | 4     | 0.037 |
| Easily resist temptations                      | 19   | 792 | 3.254 | 0.987 | 1   | 5   | 4     | 0.035 |
| Am able to control my cravings                 | 20   | 795 | 3.358 | 0.988 | 1   | 5   | 4     | 0.035 |
| Panic easily                                   | 21   | 794 | 2.275 | 1.117 | 1   | 5   | 4     | 0.040 |
| Get overwhelmed by events                      | 22   | 795 | 2.863 | 1.060 | 1   | 5   | 4     | 0.038 |
| Feel that I can't deal with things             | 23   | 794 | 2.151 | 0.971 | 1   | 5   | 4     | 0.034 |
| Remain calm under pressure                     | 24   | 796 | 3.779 | 0.972 | 1   | 5   | 4     | 0.034 |

Table 1: Descriptives of adult neuroticism items

```
c.desc <- describe(ori.health[,gsub("-", "", adult.personality.list$Con)], fast=T)
rownames(c.desc) <- personality.text[gsub("-", "", adult.personality.list$Con)]

stargazer(c.desc, rownames = T, title="Descriptives of adult conscientiousness items",
summary=F, label="tab.conitems", font.size = "small", out="tables/CDescribe.tex")
```

Traits are scored using the scoreItems function in the psych [Revelle \(2017\)](#) package.

```
adult.personality.keys <- make.keys(
  nvars=120,
  keys.list = adult.personality.list,
  item.labels = colnames(ori.health)[grepl("^PQ", colnames(ori.health))])

adult.personality.scores <- scoreItems(
  keys = adult.personality.keys,
  items=ori.health[,grepl("^PQ", colnames(ori.health))],
  impute = "none")

adult.personality.scores

## Call: scoreItems(keys = adult.personality.keys, items = ori.health[,
## grepl("^PQ", colnames(ori.health))], impute = "none")
##
## (Standardized) Alpha:
## Extra Agree Con Neur Open
## alpha 0.89 0.82 0.88 0.88 0.76
##
## Standard errors of unstandardized Alpha:
## Extra Agree Con Neur Open
## ASE 0.0067 0.0097 0.0071 0.007 0.012
##
## Standardized Alpha of observed scales:
## Extra Agree Con Neur Open
## [1,] 0.88 0.82 0.88 0.88 0.76
```

|                                                       | vars | n   | mean  | sd    | min | max | range | se    |
|-------------------------------------------------------|------|-----|-------|-------|-----|-----|-------|-------|
| Complete tasks successfully                           | 1    | 795 | 4.410 | 0.677 | 1   | 5   | 4     | 0.024 |
| Am really good at what I do                           | 2    | 794 | 4.214 | 0.705 | 1   | 5   | 4     | 0.025 |
| Handle tasks smoothly                                 | 3    | 794 | 3.995 | 0.681 | 1   | 5   | 4     | 0.024 |
| Know how to get things done                           | 4    | 793 | 4.148 | 0.701 | 1   | 5   | 4     | 0.025 |
| Like to tidy up                                       | 5    | 795 | 3.922 | 1.027 | 1   | 5   | 4     | 0.036 |
| Often forget to put things back in their proper place | 6    | 794 | 2.286 | 1.177 | 1   | 5   | 4     | 0.042 |
| Leave a mess in my room                               | 7    | 796 | 2.443 | 1.243 | 1   | 5   | 4     | 0.044 |
| Leave my belongings around                            | 8    | 795 | 2.189 | 1.177 | 1   | 5   | 4     | 0.042 |
| Keep my promises                                      | 9    | 794 | 4.504 | 0.601 | 1   | 5   | 4     | 0.021 |
| Tell the truth                                        | 10   | 795 | 4.426 | 0.655 | 1   | 5   | 4     | 0.023 |
| Break rules                                           | 11   | 794 | 2.068 | 0.968 | 1   | 5   | 4     | 0.034 |
| Break my promises                                     | 12   | 794 | 1.662 | 0.753 | 1   | 5   | 4     | 0.027 |
| Work hard                                             | 13   | 795 | 4.561 | 0.643 | 1   | 5   | 4     | 0.023 |
| Do more than what's expected of me                    | 14   | 796 | 4.168 | 0.749 | 1   | 5   | 4     | 0.027 |
| Do just enough work to get by                         | 15   | 794 | 1.899 | 0.925 | 1   | 5   | 4     | 0.033 |
| Put little time and effort into my work               | 16   | 794 | 1.820 | 1.041 | 1   | 5   | 4     | 0.037 |
| Am always prepared                                    | 17   | 795 | 3.816 | 0.839 | 1   | 5   | 4     | 0.030 |
| Carry out my plans                                    | 18   | 796 | 4.275 | 0.692 | 1   | 5   | 4     | 0.025 |
| Waste my time                                         | 19   | 796 | 2.364 | 0.978 | 1   | 5   | 4     | 0.035 |
| Have difficulty starting tasks                        | 20   | 795 | 2.360 | 1.029 | 1   | 5   | 4     | 0.037 |
| Jump into things without thinking                     | 21   | 795 | 2.396 | 1.072 | 1   | 5   | 4     | 0.038 |
| Make rash decisions                                   | 22   | 795 | 2.284 | 0.991 | 1   | 5   | 4     | 0.035 |
| Rush into things                                      | 23   | 795 | 2.302 | 0.974 | 1   | 5   | 4     | 0.035 |
| Act without thinking                                  | 24   | 796 | 2.067 | 0.926 | 1   | 5   | 4     | 0.033 |

Table 2: Descriptives of adult conscientiousness items

```
##
## Average item correlation:
##      Extra Agree  Con Neur Open
## average.r  0.24  0.16 0.23 0.23 0.12
##
## Guttman 6* reliability:
##      Extra Agree  Con Neur Open
## Lambda.6  0.93  0.89 0.92 0.92 0.85
##
## Signal/Noise based upon av.r :
##      Extra Agree Con Neur Open
## Signal/Noise  7.7  4.4 7.1  7.3  3.2
##
## Scale intercorrelations corrected for attenuation
## raw correlations below the diagonal, alpha on the diagonal
## corrected correlations above the diagonal:
##
## Note that these are the correlations of the complete scales based on the correlation matrix,
## not the observed scales based on the raw items.
##      Extra Agree  Con Neur Open
## Extra  0.89  0.25  0.43 -0.53  0.46
## Agree  0.21  0.82  0.47 -0.41  0.29
## Con    0.38  0.40  0.88 -0.58  0.13
## Neur  -0.46 -0.35 -0.51  0.88 -0.19
## Open  0.38  0.23  0.11 -0.16  0.76
##
## In order to see the item by scale loadings and frequency counts of the data
## print with the short option = FALSE
```

```
ori.health <- cbind(ori.health, adult.personality.scores$scores)
```

## 2.0.1 Facet measures of neuroticism

Structural equation modeling was used to estimate the bifactor structure of the facets. We used the lavaan Rosseel (2017) package for these models.

```
neur.items <- adult.personality.list$Neur
neur.keys <- ifelse(grepl("-", neur.items), -1, 1)
neur.items <- gsub("-", "", neur.items)
neur.items.df <- as.data.frame(reverse.code(keys=neur.keys, items = ori.health[,neur.items]))
colnames(neur.items.df) <- gsub("-", "", colnames(neur.items.df))

facet.model <- '
g.Neur =~ PQ1 + PQ31 + PQ61 + PQ91 + PQ6 + PQ36 + PQ66 + PQ96 + PQ11 + PQ41 + PQ71 + PQ101 +
        PQ16 + PQ46 + PQ76 + PQ106 + PQ21 + PQ51 + PQ81 + PQ111 + PQ26 + PQ56 + PQ86 + PQ116

Anxiety =~ PQ1 + PQ31 + PQ61 + PQ91

Anger =~ PQ6 + PQ36 + PQ66 + PQ96

Depression =~ PQ71 + PQ41 + PQ11 + PQ101

SelfConsciousness =~ PQ16 + PQ46 + PQ76 + PQ106

Immoderation =~ PQ21 + PQ51 + PQ81 + PQ111

Vulnerability =~ PQ56 + PQ26 + PQ86 + PQ116

g.Neur ~~ 0*Anxiety
g.Neur ~~ 0*Anger
g.Neur ~~ 0*Depression
g.Neur ~~ 0*SelfConsciousness
g.Neur ~~ 0*Immoderation
g.Neur ~~ 0*Vulnerability

'

facet.fit <- cfa(model=facet.model, data = neur.items.df, missing = "fiml")
#summary(facet.fit, fit.measures=T, standardized=T)

semTable(object = facet.fit, params = c("loadings", "residuals"),
         standardized = T, longtable = T, file="tables/FacetFit.tex")
```

| Parameter       | Unstandardized |      | Standardized |      |
|-----------------|----------------|------|--------------|------|
|                 | Estimate       | SE   | Estimate     | SE   |
| Factor Loadings |                |      |              |      |
| g.Neur          |                |      |              |      |
| PQ1             | 1.00*          | 0.00 | 1.00         | 0.00 |
| PQ31            | 1.63           | 0.22 | 0.79         | 0.04 |
| PQ61            | 1.62           | 0.25 | 0.76         | 0.04 |
| PQ91            | 1.67           | 0.20 | 0.94         | 0.04 |
| PQ6             | 1.03           | 0.16 | 0.61         | 0.05 |
| PQ36            | 1.42           | 0.20 | 0.71         | 0.04 |
| PQ66            | 1.31           | 0.19 | 0.65         | 0.05 |
| PQ96            | 0.71           | 0.14 | 0.33         | 0.04 |
| PQ11            | 2.18           | 0.28 | 0.77         | 0.04 |
| PQ41            | 2.15           | 0.32 | 0.73         | 0.04 |
| PQ71            | 2.04           | 0.27 | 0.75         | 0.04 |
| PQ101           | 1.38           | 0.22 | 0.49         | 0.04 |
| PQ16            | 1.54           | 0.27 | 0.51         | 0.04 |
| PQ46            | 0.89           | 0.18 | 0.38         | 0.04 |
| PQ76            | 1.21           | 0.22 | 0.41         | 0.04 |
| PQ106           | 0.53           | 0.15 | 0.22         | 0.04 |
| PQ21            | 1.25           | 0.22 | 0.38         | 0.05 |
| PQ51            | 0.43           | 0.13 | 0.16         | 0.04 |
| PQ81            | 0.17           | 0.12 | 0.11         | 0.04 |
| PQ111           | 0.82           | 0.17 | 0.30         | 0.04 |
| PQ26            | 1.54           | 0.22 | 0.83         | 0.04 |
| PQ56            | 1.50           | 0.22 | 0.73         | 0.04 |
| PQ86            | 1.70           | 0.26 | 0.71         | 0.04 |
| PQ116           | 0.98           | 0.16 | 0.60         | 0.04 |
| Anxiety         |                |      |              |      |
| PQ1             | 1.00*          | 0.00 | 1.00         | 0.00 |
| PQ31            | 0.87           | 0.11 | 0.05         | 0.03 |
| PQ61            | 0.58           | 0.10 | -0.06        | 0.03 |
| PQ91            | 1.20           | 0.12 | 0.08         | 0.03 |

|                          |       |      |       |      |
|--------------------------|-------|------|-------|------|
| <u>Anger</u>             |       |      |       |      |
| PQ6                      | 1.00* | 0.00 | 1.00  | 0.00 |
| PQ36                     | 0.83  | 0.05 | 0.59  | 0.04 |
| PQ66                     | 0.88  | 0.05 | 0.71  | 0.04 |
| PQ96                     | 0.29  | 0.05 | 0.28  | 0.05 |
| <u>Depression</u>        |       |      |       |      |
| PQ71                     | 1.00* | 0.00 | 1.00  | 0.00 |
| PQ41                     | 0.13  | 0.18 | 0.12  | 0.03 |
| PQ11                     | 1.53  | 0.31 | 0.27  | 0.03 |
| PQ101                    | -0.04 | 0.17 | 0.10  | 0.03 |
| <u>SelfConsciousness</u> |       |      |       |      |
| PQ16                     | 1.00* | 0.00 | 1.00  | 0.00 |
| PQ46                     | 0.75  | 0.12 | 0.18  | 0.03 |
| PQ76                     | 1.03  | 0.14 | 0.30  | 0.04 |
| PQ106                    | 0.23  | 0.10 | 0.05  | 0.03 |
| <u>Immoderation</u>      |       |      |       |      |
| PQ21                     | 1.00* | 0.00 | 1.00  | 0.00 |
| PQ51                     | 1.08  | 0.21 | 0.16  | 0.04 |
| PQ81                     | 1.09  | 0.22 | 0.11  | 0.04 |
| PQ111                    | 1.08  | 0.19 | 0.23  | 0.04 |
| <u>Vulnerability</u>     |       |      |       |      |
| PQ56                     | 1.00* | 0.00 | 1.00  | 0.00 |
| PQ26                     | 1.60  | 0.19 | 0.05  | 0.02 |
| PQ86                     | 0.36  | 0.11 | 0.02  | 0.03 |
| PQ116                    | 0.97  | 0.15 | -0.00 | 0.03 |
| <u>Variances</u>         |       |      |       |      |
| PQ1                      | 0.74  | 0.05 | 16.12 | .000 |
| PQ31                     | 0.78  | 0.04 | 18.07 | .000 |
| PQ61                     | 0.61  | 0.03 | 18.16 | .000 |
| PQ91                     | 0.43  | 0.03 | 12.78 | .000 |
| PQ6                      | 0.36  | 0.04 | 10.01 | .000 |
| PQ36                     | 0.48  | 0.03 | 14.83 | .000 |
| PQ66                     | 0.40  | 0.03 | 13.38 | .000 |
| PQ96                     | 0.80  | 0.04 | 19.55 | .000 |
| PQ11                     | 0.40  | 0.08 | 5.30  | .000 |
| PQ41                     | 0.49  | 0.04 | 12.11 | .000 |
| PQ71                     | 0.35  | 0.03 | 10.26 | .000 |
| PQ101                    | 0.65  | 0.04 | 16.55 | .000 |
| PQ16                     | 0.72  | 0.06 | 12.05 | .000 |
| PQ46                     | 0.83  | 0.05 | 15.62 | .000 |
| PQ76                     | 0.77  | 0.06 | 11.98 | .000 |
| PQ106                    | 1.18  | 0.06 | 19.66 | .000 |
| PQ21                     | 1.12  | 0.07 | 16.27 | .000 |
| PQ51                     | 0.82  | 0.06 | 14.57 | .000 |
| PQ81                     | 0.75  | 0.05 | 14.23 | .000 |
| PQ111                    | 0.68  | 0.05 | 13.60 | .000 |
| PQ26                     | 0.55  | 0.05 | 12.05 | .000 |
| PQ56                     | 0.69  | 0.04 | 17.98 | .000 |
| PQ86                     | 0.57  | 0.03 | 17.27 | .000 |
| PQ116                    | 0.68  | 0.04 | 18.04 | .000 |

Note. \* Indicates parameters fixed for model identification.  $\chi^2(213) = 493.25$ ,  $p = .000$ ; CFI = 0.95; TLI = 0.94; RMSEA = 0.04.

## 2.1 Remove cases without data

```
ori.health <- subset(ori.health, !is.na(Neur) | !is.na(ChildNeur))
ori.health <- subset(ori.health, !is.na(Chronic) | !is.na(SelfRatedHealth)
| !is.na(HeartCondition) | !is.na(NumberChronic)
| !is.na(Cigarettes_Ever) | !is.na(Cigarettes) | !is.na(Alcohol_Ever)
| !is.na(Alcohol_Days) | !is.na(Alcohol_Drinks) | !is.na(Alcohol_Binge)
| !is.na(Exercise_Stren) | !is.na(Exercise_Moder) | !is.na(Exercise_Mild)
| !is.na(Flossing) | !is.na(BloodSugar)
| !is.na(ChoHDLratio) | !is.na(SysBP) | !is.na(WaistHip))

HasChildP <- ifelse(!is.na(ori.health$ChildNeur), 1, 0)
HasAdultP <- ifelse(!is.na(ori.health$Neur), 1, 0)
```

## 2.2 Demographics

Study variables, with the exception of the personality items, are summarized in Table 4. Descriptions of the demographic variables are presented in Table 5.

```
stargazer(ori.health[, -which(grepl("^PQ", colnames(ori.health)))],  
  title = "Descriptive statistics of study variables",  
  label = "tab.describe", out = "tables/AllDescribe.tex")
```

| Statistic       | N     | Mean      | St. Dev. | Min    | Max     |
|-----------------|-------|-----------|----------|--------|---------|
| pchid           | 1,114 | 1,332.917 | 816.744  | 2      | 2,716   |
| gender          | 1,114 | 0.487     | 0.500    | 0      | 1       |
| income          | 640   | 3.652     | 1.043    | 1      | 5       |
| highgrd         | 1,037 | 6.891     | 1.805    | 2      | 9       |
| culture1        | 1,079 | 5.943     | 2.079    | 3      | 12      |
| parhomch        | 728   | 2.247     | 1.622    | 0      | 4       |
| momeduc         | 833   | 4.848     | 2.253    | 1      | 9       |
| dadeduc         | 819   | 5.156     | 2.669    | 1      | 9       |
| wealthy         | 693   | 3.165     | 0.694    | 1      | 5       |
| ChildExtra      | 1,104 | 0.007     | 1.003    | -4.144 | 3.243   |
| ChildAgree      | 1,104 | 0.029     | 0.992    | -3.225 | 2.800   |
| ChildCon        | 1,104 | 0.093     | 1.002    | -3.535 | 3.090   |
| ChildNeur       | 1,104 | -0.016    | 1.011    | -2.685 | 3.379   |
| ChildOpen       | 1,104 | 0.090     | 1.009    | -2.544 | 3.122   |
| SelfRatedHealth | 847   | 3.362     | 0.997    | 1      | 5       |
| Cigarettes_Ever | 846   | 0.483     | 0.500    | 0      | 1       |
| Cigarettes      | 846   | 0.344     | 0.909    | 0      | 4       |
| Alcohol_Ever    | 804   | 0.859     | 0.348    | 0      | 1       |
| Alcohol_Days    | 840   | 1.680     | 1.970    | 0      | 6       |
| Alcohol_Drinks  | 841   | 1.285     | 1.621    | 0      | 6       |
| Alcohol_Binge   | 842   | 0.580     | 1.494    | 0      | 6       |
| HeartCondition  | 842   | 0.134     | 0.341    | 0      | 1       |
| NumberChronic   | 851   | 0.713     | 0.980    | 0      | 8       |
| Chronic         | 851   | 0.469     | 0.499    | 0      | 1       |
| Exercise_Stren  | 745   | 1.984     | 1.195    | 1      | 5       |
| Exercise_Moder  | 739   | 2.691     | 1.285    | 1      | 5       |
| Exercise_Mild   | 746   | 2.933     | 1.343    | 1      | 5       |
| Flossing        | 748   | 1.592     | 0.802    | 1      | 3       |
| UrinePro        | 810   | 1.107     | 0.444    | 1      | 5       |
| BloodSugar      | 768   | 100.681   | 26.142   | 65     | 348     |
| Trigly          | 767   | 133.751   | 121.029  | 20     | 1,917   |
| HDL             | 768   | 50.992    | 16.047   | 10     | 135     |
| ChoHDLratio     | 765   | 4.285     | 1.531    | 1.800  | 27.100  |
| SysBP           | 823   | 122.394   | 15.723   | 77.000 | 200.000 |
| DiasBP          | 822   | 76.725    | 9.775    | 48.000 | 119.000 |
| WaistHip        | 819   | 0.879     | 0.087    | 0.623  | 1.188   |
| BMI             | 821   | 29.022    | 6.861    | 16.217 | 66.492  |
| clinic1_age     | 823   | 51.000    | 2.933    | 45     | 60      |
| Q5_age          | 796   | 53.141    | 2.033    | 49.083 | 59.333  |
| Q6_age          | 700   | 58.235    | 1.992    | 54.000 | 62.667  |
| Q7_age          | 839   | 60.089    | 2.031    | 56.112 | 64.578  |
| Extra           | 796   | 3.410     | 0.531    | 1.792  | 4.708   |
| Agree           | 796   | 3.850     | 0.399    | 2.208  | 4.875   |
| Con             | 796   | 4.012     | 0.461    | 2.458  | 5.000   |
| Neur            | 796   | 2.573     | 0.548    | 1.125  | 4.375   |
| Open            | 796   | 3.175     | 0.419    | 1.833  | 4.750   |

Table 4: Descriptive statistics of study variables



| Variable | Description                           | Labels                                                                                                                                                                                                                                                                                                                                             | Sample Sizes                                               |
|----------|---------------------------------------|----------------------------------------------------------------------------------------------------------------------------------------------------------------------------------------------------------------------------------------------------------------------------------------------------------------------------------------------------|------------------------------------------------------------|
| pchid    | participant ID number                 |                                                                                                                                                                                                                                                                                                                                                    |                                                            |
| gender   | self-reported gender                  | 0 - <i>female</i><br>1 - <i>male</i>                                                                                                                                                                                                                                                                                                               | 571<br>543                                                 |
| income   | self-reported maximum lifetime income | 1 - <i>Less than \$10,000</i><br>2 - <i>\$10,000-\$29,999</i><br>3 - <i>\$30,000-\$59,999</i><br>4 - <i>\$60,000-\$79,999</i><br>5 - <i>\$80,000 or more</i>                                                                                                                                                                                       | 11<br>58<br>258<br>129<br>184                              |
| highgrd  | highest level of education            | 2 - <i>junior high/intermediate school</i><br>3 - <i>some high school</i><br>4 - <i>high school grad/GED</i><br>5 - <i>some technical school</i><br>6 - <i>technical/nursing school grad</i><br>7 - <i>some college/community college</i><br>8 - <i>college grad</i><br>9 - <i>postgrad/professional degree</i>                                    | 2<br>24<br>189<br>39<br>30<br>285<br>268<br>200            |
| culture1 | racial/ethnic background              | 3 - <i>Caucasian</i><br>4 - <i>Chinese</i><br>5 - <i>Filipino</i><br>6 - <i>Hawaiian/part Hawaiian</i><br>7 - <i>Japanese</i><br>8 - <i>Korean</i><br>9 - <i>Latino</i><br>10 - <i>Okinawan</i><br>11 - <i>Other Pacific Islander</i><br>12 - <i>Other</i>                                                                                         | 216<br>67<br>100<br>213<br>373<br>8<br>28<br>44<br>8<br>22 |
| parhomch | parents own home during childhood     | 0 - <i>in none of 4 periods</i><br>1 - <i>in one of 4 periods</i><br>2 - <i>in two of 4 periods</i><br>3 - <i>in three of 4 periods</i><br>4 - <i>in four of 4 periods</i>                                                                                                                                                                         | 156<br>152<br>44<br>108<br>268                             |
| momeduc  | mother's highest level of education   | 1 - <i>eighth grade or less</i><br>2 - <i>junior high/intermediate school</i><br>3 - <i>some high school</i><br>4 - <i>high school grad/GED</i><br>5 - <i>some technical school</i><br>6 - <i>technical/nursing school grad</i><br>7 - <i>some college/community college</i><br>8 - <i>college grad</i><br>9 - <i>postgrad/professional degree</i> | 83<br>23<br>58<br>337<br>44<br>59<br>75<br>98<br>56        |
| dadeduc  | father's highest level of education   | 1 - <i>eighth grade or less</i><br>2 - <i>junior high/intermediate school</i><br>3 - <i>some high school</i><br>4 - <i>high school grad/GED</i><br>5 - <i>some technical school</i><br>6 - <i>technical/nursing school grad</i><br>7 - <i>some college/community college</i><br>8 - <i>college grad</i><br>9 - <i>postgrad/professional degree</i> | 114<br>32<br>62<br>198<br>68<br>46<br>70<br>100<br>129     |
| wealthy  | perceived wealth                      | 9 1 - <i>almost no assets/income</i><br>2 - <i>low income/assets</i><br>3 - <i>average income/assets</i><br>4 - <i>high income/assets</i><br>5 - <i>very high income/assets</i>                                                                                                                                                                    | 12<br>66<br>428<br>170<br>17                               |

Table 5: Descriptive statistics of study variables

```
ori.health <- subset(ori.health,
  select = c(pchid, gender, highgrd, culture1, wealthy,
            Q5_age, Q6_age, Q7_age, clinic1_age,
            Neur, Con, ChildNeur, ChildCon,
            income, parhomch, momeduc, dadeduc, Chronic,
            PQ1, PQ6, PQ11, PQ16, PQ21, PQ26, PQ31, PQ36,
            PQ41, PQ46, PQ51, PQ56, PQ61, PQ66, PQ71, PQ76,
            PQ81, PQ86, PQ91, PQ96, PQ101, PQ106,
            PQ111, PQ116,
            SelfRatedHealth,
            HeartCondition, NumberChronic,
            Cigarettes_Ever, Cigarettes,
            Alcohol_Ever, Alcohol_Days, Alcohol_Drinks,
            Alcohol_Binge,
            Exercise_Stren, Exercise_Moder,
            Exercise_Mild, Flossing,
            BloodSugar, ChoHDLratio, SysBP, WaistHip))
save(ori.health, file="oriHealthData.Rdata")
```

Some transformations:

```
# income, education, and personality are standardized
ori.health$income_c <- as.numeric(scale(ori.health$income))
ori.health$highgrd_c <- as.numeric(scale(ori.health$highgrd))
ori.health$Neur_c <- as.numeric(scale(ori.health$Neur, center = T, scale = F))
ori.health$Con_c <- as.numeric(scale(ori.health$Con, center = T, scale = F))
ori.health$ChildNeur <- as.numeric(scale(ori.health$ChildNeur, center = T, scale = F))
ori.health$ChildCon <- as.numeric(scale(ori.health$ChildCon, center = T, scale = F))

# create factor score from parental homeownership, mother education and father education
round(corr(ori.health[,c("parhomch", "momeduc", "dadeduc")], use="pairwise"), 2)

##           parhomch momeduc dadeduc
## parhomch    1.00    0.24    0.25
## momeduc     0.24    1.00    0.66
## dadeduc     0.25    0.66    1.00

ori.health$parhomch.z <- as.numeric(scale(ori.health$parhomch))
ori.health$momeduc.z <- as.numeric(scale(ori.health$momeduc))
ori.health$dadeduc.z <- as.numeric(scale(ori.health$dadeduc))

ori.health$childses <- rowMeans(ori.health[,c("parhomch.z", "momeduc.z", "dadeduc.z")], na.rm=T)

ori.health$Q5_age_c <- as.numeric(scale(ori.health$Q5_age))
ori.health$Q6_age_c <- as.numeric(scale(ori.health$Q6_age))
ori.health$Q7_age_c <- as.numeric(scale(ori.health$Q7_age))
ori.health$clinic1_age_c <- as.numeric(scale(ori.health$clinic1_age))
ori.health$gender <- as.numeric(scale(ori.health$gender))

# standardize continuous outcomes
ori.health$SelfRatedHealth <- as.numeric(scale(ori.health$SelfRatedHealth))
ori.health$Exercise_Moder <- as.numeric(scale(ori.health$Exercise_Moder))
ori.health$Exercise_Mild <- as.numeric(scale(ori.health$Exercise_Mild))
ori.health$Flossing <- as.numeric(scale(ori.health$Flossing))
ori.health$BloodSugar <- as.numeric(scale(ori.health$BloodSugar))
ori.health$ChoHDLratio <- as.numeric(scale(ori.health$ChoHDLratio))
ori.health$SysBP <- as.numeric(scale(ori.health$SysBP))
ori.health$WaistHip <- as.numeric(scale(ori.health$WaistHip))
```

## 3 Analyses: Main effects of neuroticism

### 3.1 Zero-order Correlations

```
corr.neur <- corr.test(y = ori.health[,c("Neur_c", "ChildNeur")],
  x = ori.health[,c("SelfRatedHealth", "Cigarettes_Ever", "Cigarettes",
                  "Alcohol_Ever", "Alcohol_Days", "Alcohol_Drinks",
                  "Alcohol_Binge",
                  "Exercise_Stren", "Exercise_Moder",
                  "Exercise_Mild", "Flossing",
                  "HeartCondition", "NumberChronic",
```

```

        "BloodSugar",
        "ChoHDLratio", "SysBP", "WaistHip"]],adjust = "none")

cors <- cor.ci(ori.health[, c("Neur_c","ChildNeur","SelfRatedHealth","Cigarettes_Ever",
        "Cigarettes","Alcohol_Ever", "Alcohol_Days", "Alcohol_Drinks",
        "Alcohol_Binge","Exercise_Stren", "Exercise_Moder", "Exercise_Mild",
        "Flossing", "HeartCondition", "NumberChronic",
        "BloodSugar","ChoHDLratio", "SysBP", "WaistHip")],
        plot = F)

corr.est <- as.data.frame(cors$rho[,c("Neur_c","ChildNeur")])
corr.est <- corr.est[-which(rownames(corr.est) %in% c("Neur_c","ChildNeur")), ]
corr.est$health <- rownames(corr.est)
corr.est <- gather(corr.est, key = "personality", value = "est", 1:2)
corci <- cors$sci
corci <- corci[grepl("Ner", rownames(corci)) | grepl("ChldN", rownames(corci)), ]
corci <- corci[-which(rownames(corci) == "Ner_c-ChldN"), ]
corci$personality <- ifelse(grepl("Ner", rownames(corci)), "Neur_c", "ChildNeur")
corci$health <- gsub("Ner_c-", "", rownames(corci))
corci$health <- gsub("ChldN-", "", corci$health)
corci$health <- recode(corci$health,recodes = "'SlfRH' = 'SelfRatedHealth';
        'Cgr_E' = 'Cigarettes_Ever';
        'Cgrtt' = 'Cigarettes';
        'Alc_E' = 'Alcohol_Ever';
        'Alchl_Dy' = 'Alcohol_Days';
        'Alchl_Dr' = 'Alcohol_Drinks';
        'Alc_B' = 'Alcohol_Binge';
        'Exr_S' = 'Exercise_Stren';
        'Exrcs_Md' = 'Exercise_Moder';
        'Exrcs_Ml' = 'Exercise_Mild';
        'Flssn' = 'Flossing';
        'HrtCn' = 'HeartCondition';
        'NmbrC' = 'NumberChronic';
        'BldSg' = 'BloodSugar';
        'ChHDL' = 'ChoHDLratio';
        'SysBP' = 'SysBP';
        'WstHp' = 'WaistHip"")
corci <- merge(corr.est, corci, by=c("health","personality"))
corci$est <- ifelse(corci$p < .05,
        paste(round(corci$est,2),"*,sep=""),
        round(corci$est,2))
corci$cor <- paste(corci$est, " [", round(corci$lower, 2), ", ", round(corci$upper,2),"]", sep="")
corci <- subset(corci, select=c(health, personality, cor))
corci <- spread(corci, key = "personality", value = "cor")

```

## 3.2 Regression estimates - SRH and Outcomes

```

neur.srh <- lm(SelfRatedHealth ~ Neur_c + gender + Q6_age_c,
        data = ori.health)
neur.heart <- glm(HeartCondition ~ Neur_c + gender + Q6_age_c,
        data = ori.health,
        family = "binomial")
neur.cond <- glm(NumberChronic ~ Neur_c + gender + Q6_age_c,
        data = ori.health,
        family = "poisson")

```

The stargazer package [Hlavac \(2015\)](#) was used to summarize the models in formatted tables. We extract the bootstrapped coefficients, confidence intervals and significance from the boot output.

```

childneur.srh <- lm(SelfRatedHealth ~ ChildNeur + gender + Q6_age_c,
        data = ori.health)
childneur.heart <- glm(HeartCondition ~ ChildNeur + gender + Q6_age_c,
        data = ori.health,
        family = "binomial")
childneur.cond <- glm.nb(NumberChronic ~ ChildNeur + gender + Q6_age_c,
        data = ori.health)

```

## 3.3 Regression estimates - Behavior

|                 | Neur_c | ChildNeur |
|-----------------|--------|-----------|
| SelfRatedHealth | -0.37* | -0.06     |
| Cigarettes_Ever | 0.07*  | 0.02      |
| Cigarettes      | 0.09*  | -0.01     |
| Alcohol_Ever    | 0.05   | -0.07     |
| Alcohol_Days    | -0.03  | -0.02     |
| Alcohol_Drinks  | 0.01   | -0.05     |
| Alcohol_Binge   | 0.05   | -0.02     |
| Exercise_Stren  | -0.1*  | -0.04     |
| Exercise_Moder  | -0.05  | -0.03     |
| Exercise_Mild   | -0.06  | 0         |
| Flossing        | 0.06   | -0.05     |
| HeartCondition  | 0.08*  | -0.03     |
| NumberChronic   | 0.15*  | 0.02      |
| BloodSugar      | 0.08   | -0.03     |
| ChoHDLratio     | 0.01   | -0.04     |
| SysBP           | 0.01   | 0.03      |
| WaistHip        | 0.08*  | -0.07     |

Table 6: Correlations between neuroticism and health measures

|                         | <i>Dependent variable:</i>  |                             |                             |
|-------------------------|-----------------------------|-----------------------------|-----------------------------|
|                         | SelfRatedHealth             | HeartCondition              | NumberChronic               |
|                         | <i>OLS</i><br>(1)           | <i>logistic</i><br>(2)      | <i>Poisson</i><br>(3)       |
| Neur_c                  | -0.593*<br>(-0.728, -0.458) | 0.213<br>(-0.245, 0.672)    | 0.246*<br>(0.072, 0.420)    |
| gender                  | -0.057<br>(-0.131, 0.017)   | 0.235<br>(-0.017, 0.487)    | -0.091<br>(-0.191, 0.009)   |
| Q6_age_c                | -0.006<br>(-0.080, 0.068)   | 0.139<br>(-0.116, 0.394)    | 0.030<br>(-0.068, 0.128)    |
| Constant                | 0.038<br>(-0.036, 0.112)    | -2.009*<br>(-2.263, -1.755) | -0.402*<br>(-0.502, -0.302) |
| Observations            | 587                         | 584                         | 590                         |
| R <sup>2</sup>          | 0.114                       |                             |                             |
| Adjusted R <sup>2</sup> | 0.110                       |                             |                             |
| Log Likelihood          |                             | -211.522                    | -659.157                    |
| Akaike Inf. Crit.       |                             | 431.043                     | 1,326.314                   |
| Residual Std. Error     | 0.913 (df = 583)            |                             |                             |
| F Statistic             | 25.089* (df = 3; 583)       |                             |                             |

Note:

\*  $p < .05$

Table 7: Main effect of neuroticism predicting self-rated health and outcomes

|                         | <i>Dependent variable:</i>  |                             |                             |
|-------------------------|-----------------------------|-----------------------------|-----------------------------|
|                         | SelfRatedHealth             | HeartCondition              | NumberChronic               |
|                         | <i>OLS</i>                  | <i>logistic</i>             | <i>negative binomial</i>    |
|                         | (1)                         | (2)                         | (3)                         |
| ChildNeur               | -0.083*<br>(-0.156, -0.010) | -0.007<br>(-0.237, 0.224)   | 0.074<br>(-0.026, 0.173)    |
| gender                  | -0.051<br>(-0.125, 0.023)   | 0.237*<br>(0.008, 0.467)    | -0.069<br>(-0.170, 0.033)   |
| Q6_age_c                | -0.005<br>(-0.078, 0.069)   | 0.236*<br>(0.004, 0.468)    | 0.073<br>(-0.027, 0.174)    |
| Constant                | 0.024<br>(-0.049, 0.098)    | -1.957*<br>(-2.189, -1.726) | -0.397*<br>(-0.498, -0.297) |
| Observations            | 687                         | 684                         | 691                         |
| R <sup>2</sup>          | 0.009                       |                             |                             |
| Adjusted R <sup>2</sup> | 0.005                       |                             |                             |
| Log Likelihood          |                             | -256.349                    | -768.174                    |
| $\theta$                |                             |                             | 3.184* (1.053)              |
| Akaike Inf. Crit.       |                             | 520.698                     | 1,544.348                   |
| Residual Std. Error     | 0.982 (df = 683)            |                             |                             |
| F Statistic             | 2.048 (df = 3; 683)         |                             |                             |

*Note:* \*  $p < .05$

Table 8: Main effect of childhood neuroticism predicting self-rated health and outcomes

```

neur.cige <- glm(Cigarettes_Ever ~ Neur_c + gender + Q6_age_c,
               data = ori.health,
               family = "binomial")
neur.cig <- glm.nb(Cigarettes ~ Neur_c + gender + Q6_age_c,
                 data = ori.health)
neur.alce <- glm(Alcohol_Ever ~ Neur_c + gender + Q6_age_c,
               data = ori.health,
               family = "binomial")
neur.alcy <- glm.nb(Alcohol_Days ~ Neur_c + gender + Q6_age_c,
                  data = ori.health)
neur.alck <- glm.nb(Alcohol_Drinks ~ Neur_c + gender + Q6_age_c,
                  data = ori.health)
neur.alcb <- glm.nb(Alcohol_Binge ~ Neur_c + gender + Q6_age_c,
                  data = ori.health)

```

```

childneur.cige <- glm(Cigarettes_Ever ~ ChildNeur + gender + Q6_age_c,
                    data = ori.health,
                    family = "binomial")
childneur.cig <- glm.nb(Cigarettes ~ ChildNeur + gender + Q6_age_c,
                      data = ori.health)
childneur.alce <- glm(Alcohol_Ever ~ ChildNeur + gender + Q6_age_c,
                    data = ori.health,
                    family = "binomial")
childneur.alcy <- glm.nb(Alcohol_Days ~ ChildNeur + gender + Q6_age_c,
                       data = ori.health)
childneur.alck <- glm.nb(Alcohol_Drinks ~ ChildNeur + gender + Q6_age_c,
                       data = ori.health)
childneur.alcb <- glm.nb(Alcohol_Binge ~ ChildNeur + gender + Q6_age_c,
                       data = ori.health)

```

```

neur.exst <- glm.nb(Exercise_Stren ~ Neur_c + gender + Q7_age_c,
                  data = ori.health)
neur.exmr <- lm(Exercise_Moder ~ Neur_c + gender + Q7_age_c,
               data = ori.health)

```

|                   | <i>Dependent variable:</i> |                             |                          |                           |                           |                             |
|-------------------|----------------------------|-----------------------------|--------------------------|---------------------------|---------------------------|-----------------------------|
|                   | Cigarettes_Ever            | Cigarettes                  | Alcohol_Ever             | Alcohol_Days              | Alcohol_Drinks            | Alcohol_Binge               |
|                   | <i>logistic</i>            | <i>negative binomial</i>    | <i>logistic</i>          | <i>negative binomial</i>  | <i>negative binomial</i>  | <i>negative binomial</i>    |
|                   | (1)                        | (2)                         | (3)                      | (4)                       | (5)                       | (6)                         |
| Neur_c            | 0.250<br>(-0.048, 0.548)   | 0.610*<br>(0.060, 1.160)    | 0.449*<br>(0.011, 0.886) | -0.020<br>(-0.219, 0.178) | 0.091<br>(-0.093, 0.274)  | 0.530*<br>(0.050, 1.009)    |
| gender            | 0.083<br>(-0.080, 0.246)   | 0.099<br>(-0.205, 0.402)    | 0.176<br>(-0.064, 0.416) | 0.112*<br>(0.003, 0.220)  | 0.314*<br>(0.213, 0.414)  | 0.733*<br>(0.469, 0.996)    |
| Q6_age_c          | 0.049<br>(-0.113, 0.212)   | -0.108<br>(-0.412, 0.196)   | 0.212<br>(-0.021, 0.445) | 0.027<br>(-0.082, 0.135)  | -0.035<br>(-0.135, 0.066) | -0.134<br>(-0.398, 0.130)   |
| Constant          | -0.048<br>(-0.210, 0.115)  | -1.306*<br>(-1.609, -1.003) | 1.791*<br>(1.547, 2.036) | 0.564*<br>(0.456, 0.673)  | 0.225*<br>(0.125, 0.325)  | -0.807*<br>(-1.070, -0.544) |
| Observations      | 588                        | 588                         | 558                      | 583                       | 583                       | 584                         |
| Log Likelihood    | -405.419                   | -338.398                    | -231.913                 | -1,049.806                | -895.211                  | -461.597                    |
| $\theta$          |                            | 0.099* (0.019)              |                          | 0.836* (0.093)            | 1.435* (0.216)            | 0.131* (0.020)              |
| Akaike Inf. Crit. | 818.838                    | 684.797                     | 471.826                  | 2,107.611                 | 1,798.422                 | 931.194                     |

Note:

\*  $p < .05$

Table 9: Main effect of neuroticism predicting unhealthy behaviors

|                   | <i>Dependent variable:</i> |                             |                           |                           |                           |                             |
|-------------------|----------------------------|-----------------------------|---------------------------|---------------------------|---------------------------|-----------------------------|
|                   | Cigarettes_Ever            | Cigarettes                  | Alcohol_Ever              | Alcohol_Days              | Alcohol_Drinks            | Alcohol_Binge               |
|                   | <i>logistic</i>            | <i>negative binomial</i>    | <i>logistic</i>           | <i>negative binomial</i>  | <i>negative binomial</i>  | <i>negative binomial</i>    |
|                   | (1)                        | (2)                         | (3)                       | (4)                       | (5)                       | (6)                         |
| ChildNeur         | 0.071<br>(-0.078, 0.221)   | 0.037<br>(-0.223, 0.298)    | -0.104<br>(-0.313, 0.106) | -0.013<br>(-0.115, 0.089) | 0.005<br>(-0.090, 0.100)  | 0.067<br>(-0.173, 0.306)    |
| gender            | 0.131<br>(-0.021, 0.282)   | 0.295*<br>(0.031, 0.559)    | 0.142<br>(-0.079, 0.362)  | 0.123*<br>(0.020, 0.226)  | 0.324*<br>(0.228, 0.421)  | 0.688*<br>(0.445, 0.932)    |
| Q6_age_c          | 0.035<br>(-0.115, 0.185)   | -0.122<br>(-0.385, 0.142)   | 0.241*<br>(0.024, 0.458)  | 0.028<br>(-0.075, 0.131)  | -0.039<br>(-0.135, 0.057) | -0.126<br>(-0.368, 0.116)   |
| Constant          | -0.093<br>(-0.243, 0.058)  | -1.138*<br>(-1.400, -0.876) | 1.758*<br>(1.537, 1.980)  | 0.544*<br>(0.442, 0.646)  | 0.208*<br>(0.112, 0.304)  | -0.735*<br>(-0.977, -0.493) |
| Observations      | 688                        | 689                         | 651                       | 685                       | 683                       | 685                         |
| Log Likelihood    | -474.236                   | -440.145                    | -273.535                  | -1,222.630                | -1,047.177                | -559.561                    |
| $\theta$          |                            | 0.110* (0.018)              |                           | 0.782* (0.080)            | 1.257* (0.166)            | 0.127* (0.017)              |
| Akaike Inf. Crit. | 956.471                    | 888.290                     | 555.070                   | 2,453.260                 | 2,102.354                 | 1,127.121                   |

Note:

\*  $p < .05$

Table 10: Main effect of childhood neuroticism predicting unhealthy behaviors

```
neur.exml <- lm(Exercise_Mild ~ Neur_c + gender + Q7_age_c,
              data = ori.health)
neur.floss <- lm(Flossing ~ Neur_c + gender + Q7_age_c,
                data = ori.health)
```

|                         | <i>Dependent variable:</i>                     |                              |                             |                             |
|-------------------------|------------------------------------------------|------------------------------|-----------------------------|-----------------------------|
|                         | Exercise_Stren<br><i>negative<br/>binomial</i> | Exercise_Moder<br><i>OLS</i> | Exercise_Mild<br><i>OLS</i> | Flossing<br><i>OLS</i>      |
|                         | (1)                                            | (2)                          | (3)                         | (4)                         |
| Neur_c                  | -0.107<br>(-0.215, 0.001)                      | -0.094<br>(-0.240, 0.052)    | -0.100<br>(-0.247, 0.046)   | 0.108<br>(-0.034, 0.251)    |
| gender                  | 0.077*<br>(0.020, 0.135)                       | 0.011<br>(-0.068, 0.091)     | -0.026<br>(-0.105, 0.053)   | 0.135*<br>(0.057, 0.212)    |
| Q7_age_c                | -0.002<br>(-0.060, 0.056)                      | -0.010<br>(-0.090, 0.069)    | 0.047<br>(-0.032, 0.126)    | -0.092*<br>(-0.170, -0.014) |
| Constant                | 0.652*<br>(0.595, 0.710)                       | -0.009<br>(-0.088, 0.070)    | -0.038<br>(-0.117, 0.041)   | -0.016<br>(-0.093, 0.061)   |
| Observations            | 602                                            | 598                          | 604                         | 605                         |
| R <sup>2</sup>          |                                                | 0.003                        | 0.006                       | 0.030                       |
| Adjusted R <sup>2</sup> |                                                | -0.002                       | 0.001                       | 0.025                       |
| Log Likelihood          | -917.538                                       |                              |                             |                             |
| $\theta$                | 46,187.200 (273,761.500)                       |                              |                             |                             |
| Akaike Inf. Crit.       | 1,843.077                                      |                              |                             |                             |
| Residual Std. Error     |                                                | 0.987 (df = 594)             | 0.985 (df = 600)            | 0.966 (df = 601)            |
| F Statistic             |                                                | 0.583 (df = 3; 594)          | 1.196 (df = 3; 600)         | 6.152* (df = 3; 601)        |

Note:

\*  $p < .05$

Table 11: Main effect of neuroticism predicting healthy behaviors

```
childneur.exst <- glm.nb(Exercise_Stren ~ ChildNeur + gender + Q7_age_c,
                        data = ori.health)
childneur.exmr <- lm(Exercise_Moder ~ ChildNeur + gender + Q7_age_c,
                    data = ori.health)
childneur.exml <- lm(Exercise_Mild ~ ChildNeur + gender + Q7_age_c,
                    data = ori.health)
childneur.floss <- lm(Flossing ~ ChildNeur + gender + Q7_age_c,
                     data = ori.health)
```

### 3.4 Regression estimates - Clinic outcomes

```
neur.blsg <- lm(BloodSugar ~ Neur_c + gender + clinic1_age_c,
               data = ori.health)
neur.ratio <- lm(ChoHDLratio ~ Neur_c + gender + clinic1_age_c,
                data = ori.health)
neur.bp <- lm(SysBP ~ Neur_c + gender + clinic1_age_c,
              data = ori.health)
neur.wh <- lm(WaistHip ~ Neur_c + gender + clinic1_age_c,
              data = ori.health)
```

```
childneur.blsg <- lm(BloodSugar ~ ChildNeur + gender + clinic1_age_c,
                    data = ori.health)
childneur.ratio <- lm(ChoHDLratio ~ ChildNeur + gender + clinic1_age_c,
                     data = ori.health)
childneur.bp <- lm(SysBP ~ ChildNeur + gender + clinic1_age_c, data = ori.health)
childneur.wh <- lm(WaistHip ~ ChildNeur + gender + clinic1_age_c, data = ori.health)
```

|                         | <i>Dependent variable:</i>                 |                              |                             |                             |
|-------------------------|--------------------------------------------|------------------------------|-----------------------------|-----------------------------|
|                         | Exercise_Stren<br><i>negative binomial</i> | Exercise_Moder<br><i>OLS</i> | Exercise_Mild<br><i>OLS</i> | Flossing<br><i>OLS</i>      |
|                         | (1)                                        | (2)                          | (3)                         | (4)                         |
| ChildNeur               | -0.011<br>(-0.062, 0.040)                  | -0.026<br>(-0.098, 0.047)    | 0.003<br>(-0.070, 0.075)    | -0.025<br>(-0.096, 0.046)   |
| gender                  | 0.080*<br>(0.028, 0.131)                   | 0.009<br>(-0.065, 0.082)     | 0.024<br>(-0.049, 0.097)    | 0.149*<br>(0.077, 0.221)    |
| Q7_age.c                | -0.014<br>(-0.066, 0.038)                  | 0.006<br>(-0.068, 0.079)     | 0.060<br>(-0.013, 0.133)    | -0.076*<br>(-0.148, -0.004) |
| Constant                | 0.686*<br>(0.635, 0.738)                   | -0.002<br>(-0.075, 0.070)    | 0.001<br>(-0.071, 0.073)    | 0.004<br>(-0.067, 0.075)    |
| Observations            | 736                                        | 730                          | 737                         | 739                         |
| R <sup>2</sup>          |                                            | 0.001                        | 0.004                       | 0.028                       |
| Adjusted R <sup>2</sup> |                                            | -0.003                       | 0.0002                      | 0.024                       |
| Log Likelihood          | -1,147.031                                 |                              |                             |                             |
| $\theta$                | 42,980.290 (234,570.400)                   |                              |                             |                             |
| Akaike Inf. Crit.       | 2,302.062                                  |                              |                             |                             |
| Residual Std. Error     |                                            | 1.000 (df = 726)             | 0.997 (df = 733)            | 0.985 (df = 735)            |
| F Statistic             |                                            | 0.209 (df = 3; 726)          | 1.049 (df = 3; 733)         | 7.140* (df = 3; 735)        |

*Note:* \*  $p < .05$

Table 12: Main effect of childhood neuroticism predicting healthy behaviors

|                         | <i>Dependent variable:</i> |                          |                           |                          |
|-------------------------|----------------------------|--------------------------|---------------------------|--------------------------|
|                         | BloodSugar                 | ChoHDLratio              | SysBP                     | WaistHip                 |
|                         | (1)                        | (2)                      | (3)                       | (4)                      |
| Neur.c                  | 0.135<br>(-0.001, 0.272)   | 0.023<br>(-0.129, 0.174) | 0.020<br>(-0.118, 0.158)  | 0.170*<br>(0.057, 0.284) |
| gender                  | 0.144*<br>(0.069, 0.218)   | 0.275*<br>(0.192, 0.358) | 0.156*<br>(0.081, 0.231)  | 0.686*<br>(0.624, 0.747) |
| clinic1_age.c           | 0.031<br>(-0.048, 0.110)   | 0.035<br>(-0.053, 0.123) | -0.007<br>(-0.087, 0.073) | 0.117*<br>(0.051, 0.182) |
| Constant                | -0.023<br>(-0.098, 0.052)  | 0.001<br>(-0.083, 0.084) | -0.048<br>(-0.123, 0.027) | 0.020<br>(-0.041, 0.082) |
| Observations            | 562                        | 561                      | 593                       | 591                      |
| R <sup>2</sup>          | 0.032                      | 0.072                    | 0.027                     | 0.461                    |
| Adjusted R <sup>2</sup> | 0.027                      | 0.067                    | 0.023                     | 0.459                    |
| Residual Std. Error     | 0.903 (df = 558)           | 1.002 (df = 557)         | 0.929 (df = 589)          | 0.760 (df = 587)         |
| F Statistic             | 6.138* (df = 3; 558)       | 14.318* (df = 3; 557)    | 5.548* (df = 3; 589)      | 167.582* (df = 3; 587)   |

*Note:* \*  $p < .05$

Table 13: Main effect of neuroticism predicting clinic measures



|                         | <i>Dependent variable:</i> |                           |                          |                          |
|-------------------------|----------------------------|---------------------------|--------------------------|--------------------------|
|                         | BloodSugar<br>(1)          | ChoHDLratio<br>(2)        | SysBP<br>(3)             | WaistHip<br>(4)          |
| ChildNeur               | -0.021<br>(-0.095, 0.052)  | -0.014<br>(-0.085, 0.056) | 0.049<br>(-0.021, 0.118) | 0.009<br>(-0.044, 0.061) |
| gender                  | 0.123*<br>(0.051, 0.195)   | 0.274*<br>(0.205, 0.344)  | 0.143*<br>(0.074, 0.212) | 0.663*<br>(0.611, 0.715) |
| clinic1_age_c           | 0.048<br>(-0.024, 0.121)   | -0.007<br>(-0.078, 0.063) | 0.026<br>(-0.043, 0.094) | 0.105*<br>(0.053, 0.157) |
| Constant                | 0.006<br>(-0.065, 0.078)   | -0.004<br>(-0.073, 0.066) | 0.008<br>(-0.061, 0.076) | 0.018<br>(-0.034, 0.070) |
| Observations            | 750                        | 747                       | 802                      | 799                      |
| R <sup>2</sup>          | 0.018                      | 0.076                     | 0.022                    | 0.449                    |
| Adjusted R <sup>2</sup> | 0.014                      | 0.072                     | 0.018                    | 0.447                    |
| Residual Std. Error     | 1.002 (df = 746)           | 0.968 (df = 743)          | 0.989 (df = 798)         | 0.746 (df = 795)         |
| F Statistic             | 4.630* (df = 3; 746)       | 20.231* (df = 3; 743)     | 6.013* (df = 3; 798)     | 216.056* (df = 3; 795)   |

Note:

\*  $p < .05$

Table 14: Main effect of childhood neuroticism predicting clinic measures

## 4 Analyses: Neuroticism by conscientiousness

### 4.1 Regression estimates - SRH and Outcomes

```
con.srh <- lm(SelfRatedHealth ~ Neur_c*Con_c + gender + Q6_age_c, data = ori.health)
con.heart <- glm(HeartCondition ~ Neur_c*Con_c + gender + Q6_age_c, data = ori.health,
  family = "binomial")
con.cond <- glm(NumberChronic ~ Neur_c*Con_c + gender + Q6_age_c, data = ori.health,
  family = "poisson")
```

### 4.2 Regression estimates - Behavior

```
con.cige <- glm(Cigarettes_Ever ~ Neur_c*Con_c + gender + Q6_age_c,
  data = ori.health, family = "binomial")
con.cig <- glm.nb(Cigarettes ~ Neur_c*Con_c + gender + Q6_age_c,
  data = ori.health)
con.alce <- glm(Alcohol_Ever ~ Neur_c*Con_c + gender + Q6_age_c,
  data = ori.health, family = "binomial")
con.alcy <- glm.nb(Alcohol_Days ~ Neur_c*Con_c + gender + Q6_age_c,
  data = ori.health)
con.alck <- glm.nb(Alcohol_Drinks ~ Neur_c*Con_c + gender + Q6_age_c,
  data = ori.health)
con.alcb <- glm.nb(Alcohol_Binge ~ Neur_c*Con_c + gender + Q6_age_c,
  data = ori.health)
```

Here we plot the significant interaction predict binge drinking. We use the sjPlot package [Ldecke \(2017\)](#).

```
pdf("plots/int_con_alcb.pdf")
sjp.int(con.alcb, type="eff", mdrt.values = "meansd", swap.pred = T,
  axis.title = "Neuroticism", legend.title = "Conscientiousness",
  legend.labels = c("-1SD", "Mean", "+1SD"), show.ci = T,
  title="Interaction of adult conscientiousness and neuroticism on binge drinking")
dev.off()
```

|                         | <i>Dependent variable:</i>           |                                          |                                        |
|-------------------------|--------------------------------------|------------------------------------------|----------------------------------------|
|                         | SelfRatedHealth<br><i>OLS</i><br>(1) | HeartCondition<br><i>logistic</i><br>(2) | NumberChronic<br><i>Poisson</i><br>(3) |
| Neur.c                  | -0.541*<br>(-0.698, -0.384)          | 0.227<br>(-0.301, 0.755)                 | 0.227*<br>(0.027, 0.428)               |
| Con.c                   | 0.131<br>(-0.057, 0.319)             | 0.081<br>(-0.557, 0.719)                 | -0.045<br>(-0.294, 0.203)              |
| gender                  | -0.052<br>(-0.127, 0.023)            | 0.230<br>(-0.025, 0.485)                 | -0.093<br>(-0.193, 0.008)              |
| Q6_age.c                | -0.004<br>(-0.078, 0.070)            | 0.133<br>(-0.123, 0.388)                 | 0.029<br>(-0.069, 0.128)               |
| Neur.c:Con.c            | 0.106<br>(-0.170, 0.383)             | 0.797<br>(-0.286, 1.881)                 | -0.017<br>(-0.376, 0.342)              |
| Constant                | 0.049<br>(-0.033, 0.131)             | -1.929*<br>(-2.201, -1.657)              | -0.403*<br>(-0.513, -0.294)            |
| Observations            | 587                                  | 584                                      | 590                                    |
| R <sup>2</sup>          | 0.118                                |                                          |                                        |
| Adjusted R <sup>2</sup> | 0.111                                |                                          |                                        |
| Log Likelihood          |                                      | -210.304                                 | -659.082                               |
| Akaike Inf. Crit.       |                                      | 432.609                                  | 1,330.165                              |
| Residual Std. Error     | 0.912 (df = 581)                     |                                          |                                        |
| F Statistic             | 15.571* (df = 5; 581)                |                                          |                                        |

*Note:* \*  $p < .05$

Table 15: Interaction of conscientiousness and neuroticism predicting self-rated health and outcomes

|                   | <i>Dependent variable:</i>                |                                               |                                        |                                                 |                                                   |                                                  |
|-------------------|-------------------------------------------|-----------------------------------------------|----------------------------------------|-------------------------------------------------|---------------------------------------------------|--------------------------------------------------|
|                   | Cigarettes_Ever<br><i>logistic</i><br>(1) | Cigarettes<br><i>negative binomial</i><br>(2) | Alcohol_Ever<br><i>logistic</i><br>(3) | Alcohol_Days<br><i>negative binomial</i><br>(4) | Alcohol_Drinks<br><i>negative binomial</i><br>(5) | Alcohol_Binge<br><i>negative binomial</i><br>(6) |
| Neur_c            | 0.171<br>(-0.175, 0.517)                  | 0.571<br>(-0.063, 1.205)                      | 0.434<br>(-0.084, 0.952)               | -0.047<br>(-0.278, 0.184)                       | 0.087<br>(-0.126, 0.300)                          | 0.444<br>(-0.108, 0.996)                         |
| Con_c             | -0.183<br>(-0.598, 0.231)                 | -0.058<br>(-0.824, 0.709)                     | 0.048<br>(-0.560, 0.657)               | -0.060<br>(-0.335, 0.215)                       | -0.013<br>(-0.267, 0.242)                         | -0.311<br>(-0.973, 0.351)                        |
| gender            | 0.074<br>(-0.091, 0.238)                  | 0.096<br>(-0.210, 0.402)                      | 0.173<br>(-0.069, 0.416)               | 0.107<br>(-0.002, 0.217)                        | 0.314*<br>(0.213, 0.415)                          | 0.686*<br>(0.422, 0.950)                         |
| Q6_age_c          | 0.045<br>(-0.118, 0.208)                  | -0.113<br>(-0.417, 0.192)                     | 0.210<br>(-0.024, 0.444)               | 0.024<br>(-0.084, 0.133)                        | -0.034<br>(-0.135, 0.066)                         | -0.184<br>(-0.448, 0.080)                        |
| Neur_c:Con_c      | 0.040<br>(-0.572, 0.652)                  | 0.197<br>(-0.956, 1.351)                      | 0.416<br>(-0.418, 1.249)               | 0.047<br>(-0.358, 0.452)                        | -0.049<br>(-0.424, 0.326)                         | 1.264*<br>(0.181, 2.347)                         |
| Constant          | -0.040<br>(-0.219, 0.140)                 | -1.282*<br>(-1.614, -0.949)                   | 1.846*<br>(1.574, 2.117)               | 0.571*<br>(0.452, 0.690)                        | 0.219*<br>(0.108, 0.330)                          | -0.690*<br>(-0.972, -0.407)                      |
| Observations      | 588                                       | 588                                           | 558                                    | 583                                             | 583                                               | 584                                              |
| Log Likelihood    | -405.038                                  | -338.350                                      | -231.450                               | -1,049.692                                      | -895.175                                          | -459.445                                         |
| $\theta$          |                                           | 0.099* (0.019)                                |                                        | 0.837* (0.094)                                  | 1.435* (0.216)                                    | 0.135* (0.020)                                   |
| Akaike Inf. Crit. | 822.076                                   | 688.701                                       | 474.901                                | 2,111.383                                       | 1,802.350                                         | 930.891                                          |

Note:

\*  $p < .05$

Table 16: Interaction of conscientiousness and neuroticism predicting unhealthy behaviors

```
## pdf
## 2
```

### Interaction of adult conscientiousness and neuroticism on binge drinking

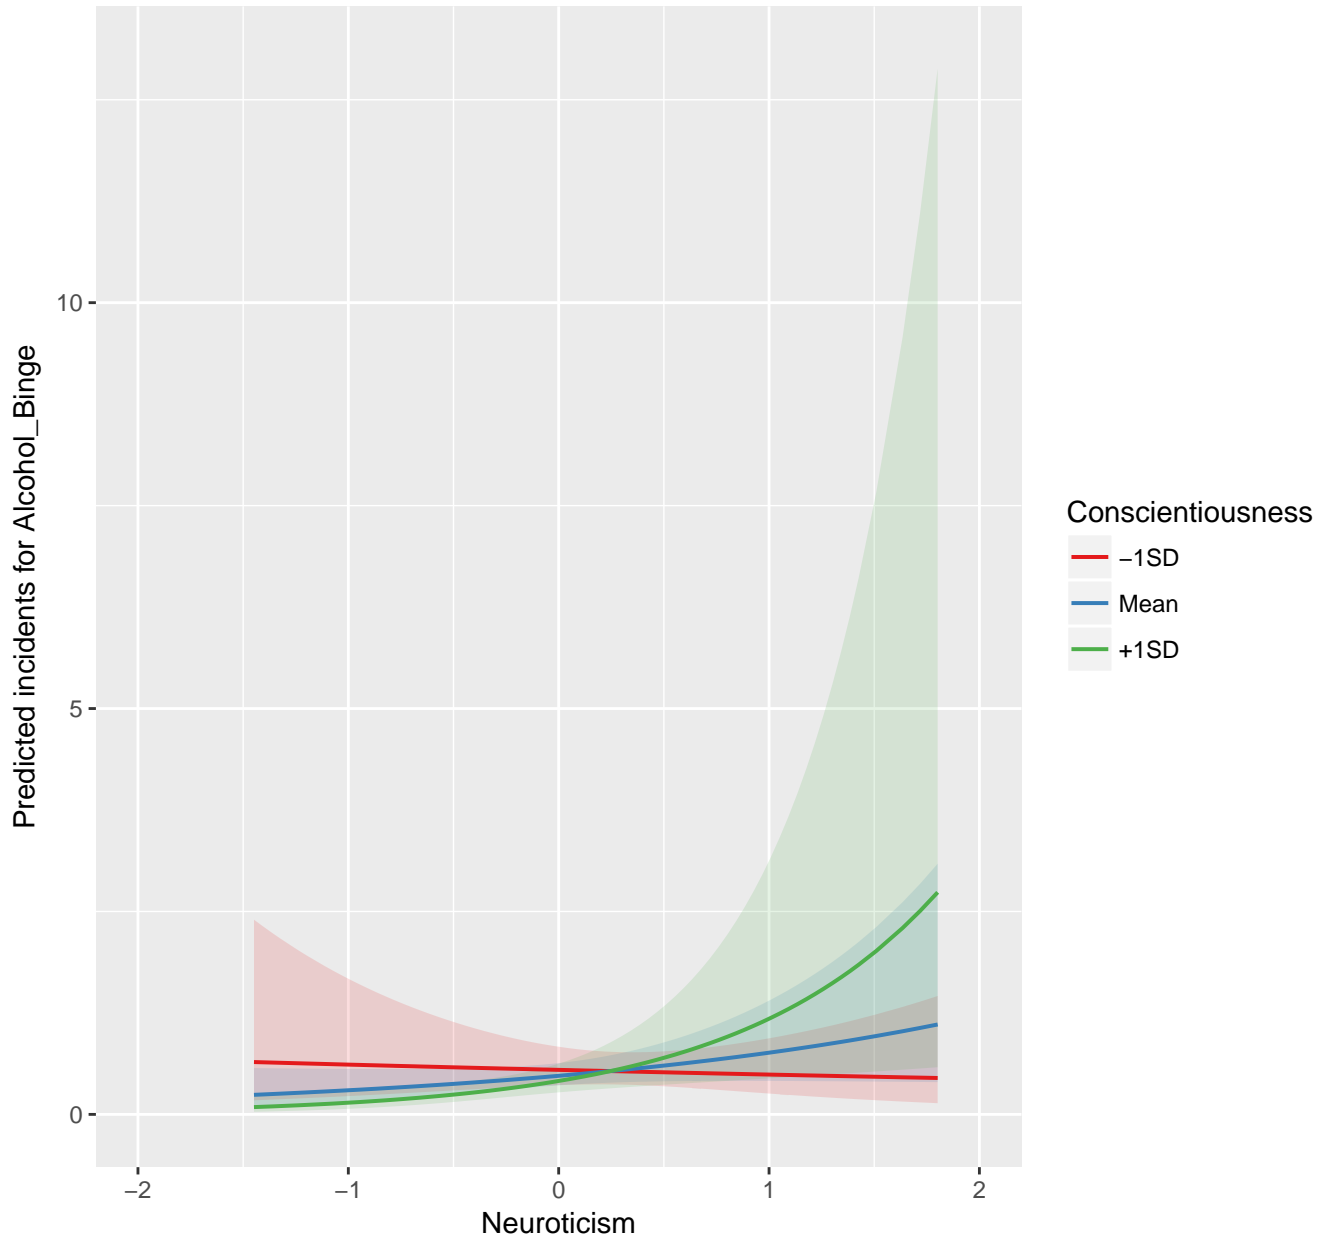

```
con.exst <- glm.nb(Exercise_Stren ~ Neur_c*Con_c + gender + Q7_age_c,  
  data = ori.health)  
con.exmr <- lm(Exercise_Moder ~ Neur_c*Con_c + gender + Q7_age_c,  
  data = ori.health)  
con.exml <- lm(Exercise_Mild ~ Neur_c*Con_c + gender + Q7_age_c,  
  data = ori.health)  
con.floss <- lm(Flossing ~ Neur_c*Con_c + gender + Q7_age_c,  
  data = ori.health)
```

|                         | <i>Dependent variable:</i>                            |                                     |                                    |                               |
|-------------------------|-------------------------------------------------------|-------------------------------------|------------------------------------|-------------------------------|
|                         | Exercise.Stren<br><i>negative<br/>binomial</i><br>(1) | Exercise.Moder<br><i>OLS</i><br>(2) | Exercise.Mild<br><i>OLS</i><br>(3) | Flossing<br><i>OLS</i><br>(4) |
| Neur.c                  | -0.053<br>(-0.181, 0.075)                             | -0.091<br>(-0.265, 0.083)           | -0.013<br>(-0.187, 0.161)          | 0.053<br>(-0.117, 0.222)      |
| Con.c                   | 0.115<br>(-0.036, 0.265)                              | 0.002<br>(-0.204, 0.208)            | 0.187<br>(-0.018, 0.391)           | -0.114<br>(-0.314, 0.086)     |
| gender                  | 0.084*<br>(0.026, 0.142)                              | 0.010<br>(-0.070, 0.090)            | -0.017<br>(-0.097, 0.062)          | 0.131*<br>(0.053, 0.209)      |
| Q7_age.c                | 0.001<br>(-0.057, 0.059)                              | -0.011<br>(-0.091, 0.069)           | 0.052<br>(-0.028, 0.131)           | -0.095*<br>(-0.172, -0.017)   |
| Neur.c:Con.c            | -0.039<br>(-0.239, 0.160)                             | 0.120<br>(-0.153, 0.394)            | 0.077<br>(-0.199, 0.352)           | -0.155<br>(-0.423, 0.112)     |
| Constant                | 0.647*<br>(0.583, 0.711)                              | 0.007<br>(-0.080, 0.095)            | -0.027<br>(-0.113, 0.060)          | -0.037<br>(-0.122, 0.048)     |
| Observations            | 602                                                   | 598                                 | 604                                | 605                           |
| R <sup>2</sup>          |                                                       | 0.004                               | 0.012                              | 0.034                         |
| Adjusted R <sup>2</sup> |                                                       | -0.004                              | 0.003                              | 0.026                         |
| Log Likelihood          | -916.313                                              |                                     |                                    |                               |
| $\theta$                | 46,749.410 (277,100.300)                              |                                     |                                    |                               |
| Akaike Inf. Crit.       | 1,844.626                                             |                                     |                                    |                               |
| Residual Std. Error     |                                                       | 0.988 (df = 592)                    | 0.984 (df = 598)                   | 0.966 (df = 599)              |
| F Statistic             |                                                       | 0.498 (df = 5; 592)                 | 1.416 (df = 5; 598)                | 4.202* (df = 5; 599)          |

Note:

\*  $p < .05$

Table 17: Interaction of conscientiousness and neuroticism predicting healthy behaviors

### 4.3 Regression estimates - Clinic outcomes

```
con.blsg <- lm(BloodSugar ~ Neur_c*Con_c + gender + clinic1_age_c,
              data = ori.health)
con.ratio <- lm(ChoHDLratio ~ Neur_c*Con_c + gender + clinic1_age_c,
              data = ori.health)
con.bp <- lm(SysBP ~ Neur_c*Con_c + gender + clinic1_age_c,
            data = ori.health)
con.wh <- lm(WaistHip ~ Neur_c*Con_c + gender + clinic1_age_c,
            data = ori.health)
```

|                         | <i>Dependent variable:</i> |                           |                           |                           |
|-------------------------|----------------------------|---------------------------|---------------------------|---------------------------|
|                         | BloodSugar<br>(1)          | ChoHDLratio<br>(2)        | SysBP<br>(3)              | WaistHip<br>(4)           |
| Neur_c                  | 0.082<br>(-0.080, 0.243)   | -0.004<br>(-0.184, 0.175) | 0.098<br>(-0.064, 0.259)  | 0.148*<br>(0.015, 0.281)  |
| Con_c                   | -0.121<br>(-0.317, 0.074)  | -0.064<br>(-0.281, 0.153) | 0.165<br>(-0.028, 0.358)  | -0.051<br>(-0.210, 0.107) |
| gender                  | 0.140*<br>(0.065, 0.215)   | 0.272*<br>(0.189, 0.356)  | 0.159*<br>(0.084, 0.234)  | 0.684*<br>(0.622, 0.746)  |
| clinic1_age_c           | 0.029<br>(-0.050, 0.108)   | 0.034<br>(-0.054, 0.122)  | -0.006<br>(-0.085, 0.074) | 0.116*<br>(0.050, 0.182)  |
| Neur_c:Con_c            | -0.039<br>(-0.319, 0.241)  | 0.086<br>(-0.225, 0.398)  | 0.242<br>(-0.035, 0.518)  | 0.014<br>(-0.214, 0.243)  |
| Constant                | -0.030<br>(-0.113, 0.054)  | 0.011<br>(-0.082, 0.104)  | -0.014<br>(-0.097, 0.069) | 0.021<br>(-0.047, 0.090)  |
| Observations            | 562                        | 561                       | 593                       | 591                       |
| R <sup>2</sup>          | 0.035                      | 0.073                     | 0.037                     | 0.462                     |
| Adjusted R <sup>2</sup> | 0.026                      | 0.064                     | 0.029                     | 0.457                     |
| Residual Std. Error     | 0.903 (df = 556)           | 1.003 (df = 555)          | 0.926 (df = 587)          | 0.761 (df = 585)          |
| F Statistic             | 4.001* (df = 5; 556)       | 8.687* (df = 5; 555)      | 4.556* (df = 5; 587)      | 100.359* (df = 5; 585)    |

Note:

\*  $p < .05$

Table 18: Interaction of conscientiousness and neuroticism predicting clinic measures

## 5 Analyses: Childhood neuroticism by childhood conscientiousness

### 5.1 Regression estimates - SRH and Outcomes

```
set.seed(1959)
childcon.srh <- lm(SelfRatedHealth ~ ChildNeur*ChildCon + gender + Q6_age_c,
                  data = ori.health)
childcon.heart <- glm(HeartCondition ~ ChildNeur*ChildCon + gender + Q6_age_c,
                    data = ori.health,
                    family = "binomial")
childcon.cond <- glm(NumberChronic ~ ChildNeur*ChildCon + gender + Q6_age_c,
                    data = ori.health,
                    family = "poisson")
```

|                         | <i>Dependent variable:</i>  |                             |                             |
|-------------------------|-----------------------------|-----------------------------|-----------------------------|
|                         | SelfRatedHealth             | HeartCondition              | NumberChronic               |
|                         | <i>OLS</i><br>(1)           | <i>logistic</i><br>(2)      | <i>Poisson</i><br>(3)       |
| ChildNeur               | -0.083*<br>(-0.156, -0.009) | -0.014<br>(-0.243, 0.216)   | 0.073<br>(-0.017, 0.163)    |
| ChildCon                | 0.035<br>(-0.043, 0.113)    | 0.051<br>(-0.191, 0.293)    | -0.066<br>(-0.162, 0.029)   |
| gender                  | -0.041<br>(-0.118, 0.036)   | 0.244*<br>(0.006, 0.483)    | -0.087<br>(-0.183, 0.009)   |
| Q6_age_c                | -0.004<br>(-0.078, 0.069)   | 0.239*<br>(0.007, 0.472)    | 0.071<br>(-0.020, 0.162)    |
| ChildNeur:ChildCon      | -0.006<br>(-0.077, 0.065)   | 0.101<br>(-0.112, 0.313)    | 0.025<br>(-0.061, 0.111)    |
| Constant                | 0.023<br>(-0.051, 0.097)    | -1.969*<br>(-2.203, -1.734) | -0.398*<br>(-0.490, -0.307) |
| Observations            | 687                         | 684                         | 691                         |
| R <sup>2</sup>          | 0.010                       |                             |                             |
| Adjusted R <sup>2</sup> | 0.003                       |                             |                             |
| Log Likelihood          |                             | -255.892                    | -773.183                    |
| Akaike Inf. Crit.       |                             | 523.784                     | 1,558.365                   |
| Residual Std. Error     | 0.983 (df = 681)            |                             |                             |
| F Statistic             | 1.393 (df = 5; 681)         |                             |                             |
| <i>Note:</i>            |                             |                             | * $p < .05$                 |

Table 19: Interaction of childhood conscientiousness and neuroticism predicting self-rated health and outcomes

## 5.2 Regression estimates - Behavior

```
childcon.cige <- glm(Cigarettes_Ever ~ ChildNeur*ChildCon + gender + Q6_age_c,
  data = ori.health,
  family = "binomial")
childcon.cig <- glm.nb(Cigarettes ~ ChildNeur*ChildCon + gender + Q6_age_c,
  data = ori.health)
childcon.alce <- glm(Alcohol_Ever ~ ChildNeur*ChildCon + gender + Q6_age_c,
  data = ori.health,
  family = "binomial")
childcon.alcy <- glm.nb(Alcohol_Days ~ ChildNeur*ChildCon + gender + Q6_age_c,
  data = ori.health)
childcon.alck <- glm.nb(Alcohol_Drinks ~ ChildNeur*ChildCon + gender + Q6_age_c,
  data = ori.health)
childcon.alcb <- glm.nb(Alcohol_Binge ~ ChildNeur*ChildCon + gender + Q6_age_c,
  data = ori.health)
```

|                    | <i>Dependent variable:</i>                |                                               |                                        |                                                 |                                                   |                                                  |
|--------------------|-------------------------------------------|-----------------------------------------------|----------------------------------------|-------------------------------------------------|---------------------------------------------------|--------------------------------------------------|
|                    | Cigarettes_Ever<br><i>logistic</i><br>(1) | Cigarettes<br><i>negative binomial</i><br>(2) | Alcohol_Ever<br><i>logistic</i><br>(3) | Alcohol_Days<br><i>negative binomial</i><br>(4) | Alcohol_Drinks<br><i>negative binomial</i><br>(5) | Alcohol_Binge<br><i>negative binomial</i><br>(6) |
| ChildNeur          | 0.078<br>(-0.074, 0.230)                  | 0.027<br>(-0.233, 0.287)                      | -0.091<br>(-0.301, 0.119)              | -0.007<br>(-0.110, 0.095)                       | 0.008<br>(-0.088, 0.103)                          | 0.024<br>(-0.217, 0.264)                         |
| ChildCon           | -0.323*<br>(-0.489, -0.157)               | -0.184<br>(-0.461, 0.092)                     | 0.055<br>(-0.173, 0.284)               | -0.017<br>(-0.126, 0.092)                       | -0.041<br>(-0.143, 0.060)                         | -0.214<br>(-0.470, 0.041)                        |
| gender             | 0.052<br>(-0.107, 0.210)                  | 0.242<br>(-0.029, 0.514)                      | 0.167<br>(-0.063, 0.397)               | 0.123*<br>(0.016, 0.229)                        | 0.320*<br>(0.220, 0.420)                          | 0.667*<br>(0.418, 0.916)                         |
| Q6_age_c           | 0.030<br>(-0.122, 0.182)                  | -0.116<br>(-0.378, 0.146)                     | 0.244*<br>(0.027, 0.462)               | 0.028<br>(-0.075, 0.130)                        | -0.040<br>(-0.136, 0.056)                         | -0.112<br>(-0.352, 0.129)                        |
| ChildNeur:ChildCon | -0.024<br>(-0.172, 0.124)                 | -0.044<br>(-0.296, 0.207)                     | -0.144<br>(-0.336, 0.049)              | -0.061<br>(-0.160, 0.039)                       | -0.077<br>(-0.170, 0.016)                         | -0.199<br>(-0.436, 0.038)                        |
| Constant           | -0.079<br>(-0.231, 0.073)                 | -1.147*<br>(-1.408, -0.886)                   | 1.772*<br>(1.548, 1.996)               | 0.545*<br>(0.443, 0.648)                        | 0.210*<br>(0.114, 0.306)                          | -0.756*<br>(-0.997, -0.515)                      |
| Observations       | 688                                       | 689                                           | 651                                    | 685                                             | 683                                               | 685                                              |
| Log Likelihood     | -466.715                                  | -439.143                                      | -272.363                               | -1,221.847                                      | -1,045.634                                        | -557.042                                         |
| $\theta$           |                                           | 0.113* (0.018)                                |                                        | 0.787* (0.081)                                  | 1.272* (0.169)                                    | 0.131* (0.018)                                   |
| Akaike Inf. Crit.  | 945.431                                   | 890.287                                       | 556.726                                | 2,455.695                                       | 2,103.267                                         | 1,126.084                                        |

Note:

\*  $p < .05$

Table 20: Interaction of childhood conscientiousness and neuroticism predicting unhealthy behaviors

```
pdf("plots/int_childcon_alcb.pdf")
sjp.int(childcon.alcb, type="eff", mdrt.values = "meansd",
  swap.pred = T, legend.labels = c("-1SD", "Mean", "+1SD"), show.ci = T,
  axis.title = "Child neuroticism", legend.title = "Child conscientiousness",
  title = "Interaction of child conscientiousness and neuroticism on adult binge drinking")
dev.off()

## pdf
## 2
```



## Interaction of child conscientiousness and neuroticism on adult binge drinking

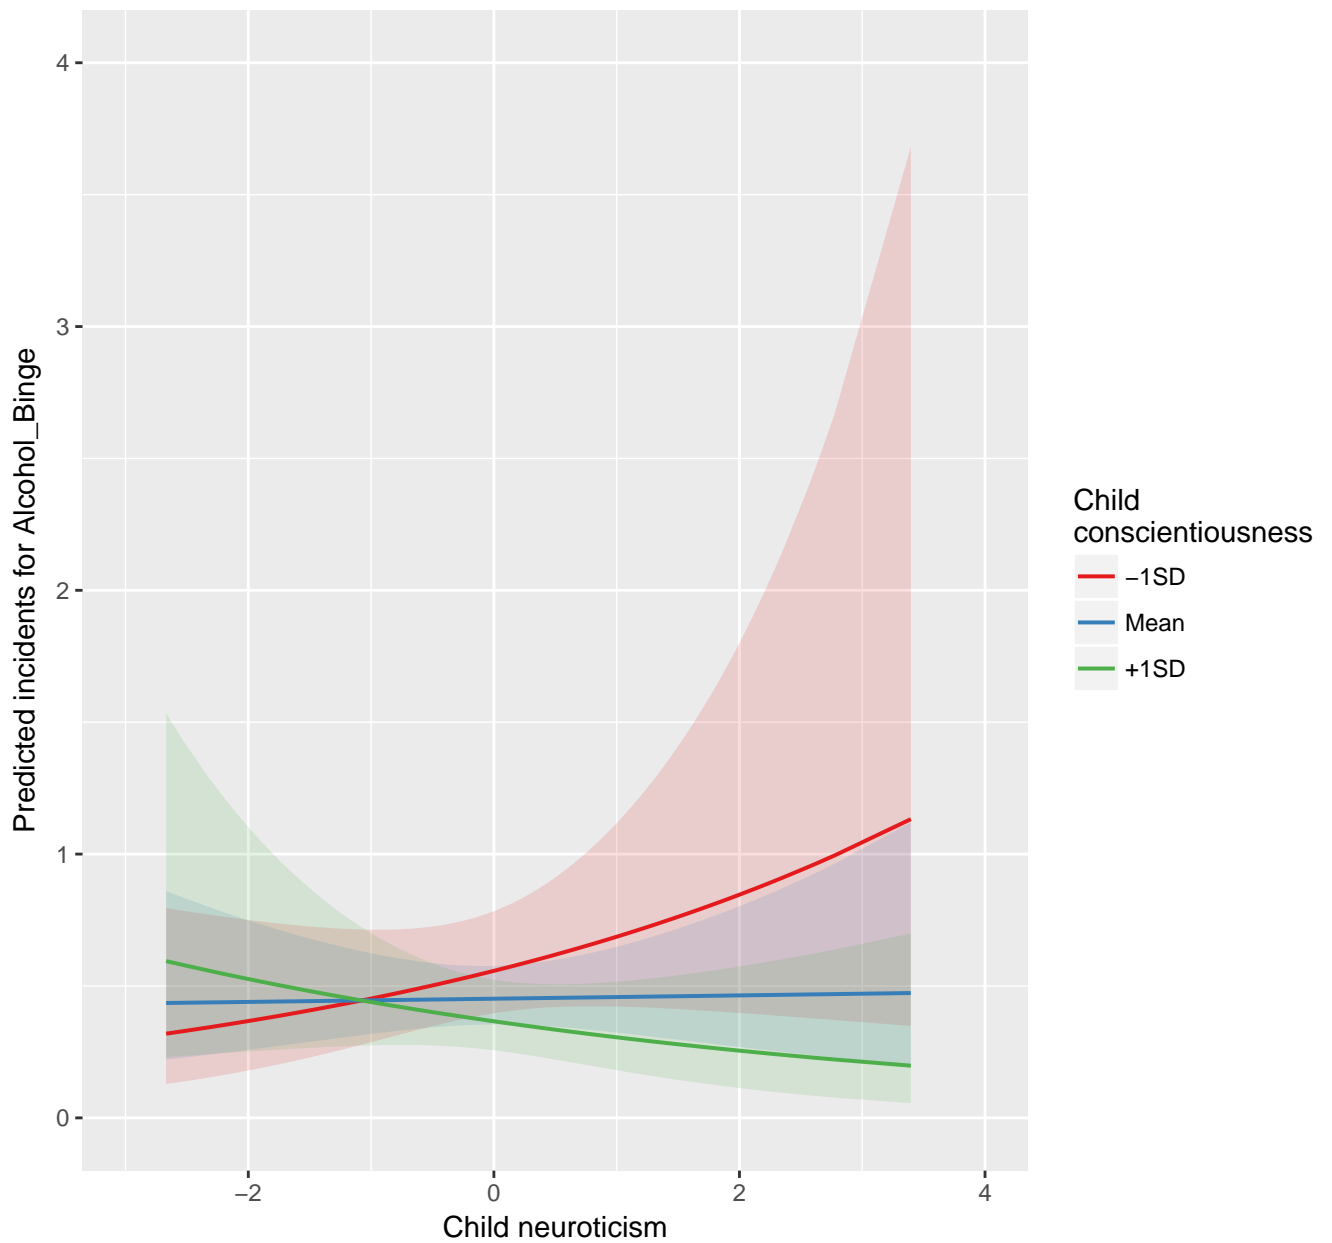

```
childcon.exst <- glm.nb(Exercise_Stren ~ ChildNeur*ChildCon + gender + Q7_age_c,  
  data = ori.health)  
childcon.exmr <- lm(Exercise_Moder ~ ChildNeur*ChildCon + gender + Q7_age_c,  
  data = ori.health)  
childcon.exml <- lm(Exercise_Mild ~ ChildNeur*ChildCon + gender + Q7_age_c,  
  data = ori.health)  
childcon.floss <- lm(Flossing ~ ChildNeur*ChildCon + gender + Q7_age_c,  
  data = ori.health)
```

### 5.3 Regression estimates - Clinic outcomes

|                         | <i>Dependent variable:</i>                            |                                     |                                    |                               |
|-------------------------|-------------------------------------------------------|-------------------------------------|------------------------------------|-------------------------------|
|                         | Exercise_Stren<br><i>negative<br/>binomial</i><br>(1) | Exercise_Moder<br><i>OLS</i><br>(2) | Exercise_Mild<br><i>OLS</i><br>(3) | Flossing<br><i>OLS</i><br>(4) |
| ChildNeur               | -0.012<br>(-0.063, 0.039)                             | -0.027<br>(-0.100, 0.045)           | 0.001<br>(-0.071, 0.074)           | -0.024<br>(-0.096, 0.047)     |
| ChildCon                | -0.017<br>(-0.070, 0.036)                             | -0.052<br>(-0.127, 0.024)           | -0.056<br>(-0.131, 0.019)          | -0.046<br>(-0.120, 0.028)     |
| gender                  | 0.074*<br>(0.020, 0.128)                              | -0.005<br>(-0.081, 0.071)           | 0.009<br>(-0.067, 0.084)           | 0.137*<br>(0.063, 0.212)      |
| Q7_age_c                | -0.015<br>(-0.067, 0.037)                             | 0.003<br>(-0.071, 0.076)            | 0.057<br>(-0.016, 0.130)           | -0.078*<br>(-0.151, -0.006)   |
| ChildNeur:ChildCon      | 0.020<br>(-0.026, 0.066)                              | 0.006<br>(-0.060, 0.072)            | -0.006<br>(-0.072, 0.060)          | -0.021<br>(-0.087, 0.044)     |
| Constant                | 0.686*<br>(0.635, 0.737)                              | -0.002<br>(-0.075, 0.071)           | 0.002<br>(-0.070, 0.074)           | 0.005<br>(-0.066, 0.076)      |
| Observations            | 736                                                   | 730                                 | 737                                | 739                           |
| R <sup>2</sup>          |                                                       | 0.004                               | 0.007                              | 0.031                         |
| Adjusted R <sup>2</sup> |                                                       | -0.003                              | 0.0004                             | 0.024                         |
| Log Likelihood          | -1,146.372                                            |                                     |                                    |                               |
| $\theta$                | 43,245.880 (236,023.700)                              |                                     |                                    |                               |
| Akaike Inf. Crit.       | 2,304.745                                             |                                     |                                    |                               |
| Residual Std. Error     |                                                       | 1.000 (df = 724)                    | 0.997 (df = 731)                   | 0.986 (df = 733)              |
| F Statistic             |                                                       | 0.514 (df = 5; 724)                 | 1.063 (df = 5; 731)                | 4.622* (df = 5; 733)          |

*Note:* \*  $p < .05$

Table 21: Interaction of childhood conscientiousness and childconoticism predicting healthy behaviors

```

childcon.blsg <- lm(BloodSugar ~ ChildNeur*ChildCon + gender + clinic1_age_c,
                  data = ori.health)
childcon.ratio <- lm(ChoHDLratio ~ ChildNeur*ChildCon + gender + clinic1_age_c,
                   data = ori.health)
childcon.bp <- lm(SysBP ~ ChildNeur*ChildCon + gender + clinic1_age_c,
                 data = ori.health)
childcon.wh <- lm(WaistHip ~ ChildNeur*ChildCon + gender + clinic1_age_c,
                 data = ori.health)

```

|                         | <i>Dependent variable:</i>  |                             |                           |                             |
|-------------------------|-----------------------------|-----------------------------|---------------------------|-----------------------------|
|                         | BloodSugar<br>(1)           | ChoHDLratio<br>(2)          | SysBP<br>(3)              | WaistHip<br>(4)             |
| ChildNeur               | -0.023<br>(-0.096, 0.050)   | -0.017<br>(-0.087, 0.054)   | 0.049<br>(-0.021, 0.119)  | 0.005<br>(-0.047, 0.057)    |
| ChildCon                | -0.084*<br>(-0.160, -0.008) | -0.109*<br>(-0.183, -0.036) | -0.031<br>(-0.104, 0.042) | -0.099*<br>(-0.153, -0.044) |
| gender                  | 0.094*<br>(0.018, 0.171)    | 0.237*<br>(0.164, 0.311)    | 0.133*<br>(0.059, 0.206)  | 0.628*<br>(0.573, 0.682)    |
| clinic1_age_c           | 0.043<br>(-0.030, 0.116)    | -0.014<br>(-0.084, 0.056)   | 0.024<br>(-0.045, 0.093)  | 0.098*<br>(0.047, 0.150)    |
| ChildNeur:ChildCon      | 0.004<br>(-0.066, 0.073)    | 0.022<br>(-0.045, 0.089)    | -0.009<br>(-0.075, 0.056) | 0.056*<br>(0.007, 0.105)    |
| Constant                | 0.007<br>(-0.065, 0.079)    | -0.003<br>(-0.072, 0.066)   | 0.008<br>(-0.060, 0.077)  | 0.017<br>(-0.035, 0.068)    |
| Observations            | 750                         | 747                         | 802                       | 799                         |
| R <sup>2</sup>          | 0.025                       | 0.087                       | 0.023                     | 0.462                       |
| Adjusted R <sup>2</sup> | 0.018                       | 0.081                       | 0.017                     | 0.459                       |
| Residual Std. Error     | 1.000 (df = 744)            | 0.963 (df = 741)            | 0.990 (df = 796)          | 0.738 (df = 793)            |
| F Statistic             | 3.738* (df = 5; 744)        | 14.107* (df = 5; 741)       | 3.749* (df = 5; 796)      | 136.262* (df = 5; 793)      |

Note:

\*  $p < .05$

Table 22: Interaction of childhood conscientiousness and neuroticism predicting clinic measures

```

pdf("plots/int_childcon_wh.pdf")
sjp.int(childcon.wh, type="eff", mdrt.values = "meansd", swap.pred = T,
        legend.labels = c("-1SD", "Mean", "+1SD"), show.ci = T,
        axis.title = "Child neuroticism", legend.title = "Child conscientiousness",
        title = "Interaction of child conscientiousness and neuroticism on adult waist-to-hip ratio")
dev.off()

## pdf
## 2

```

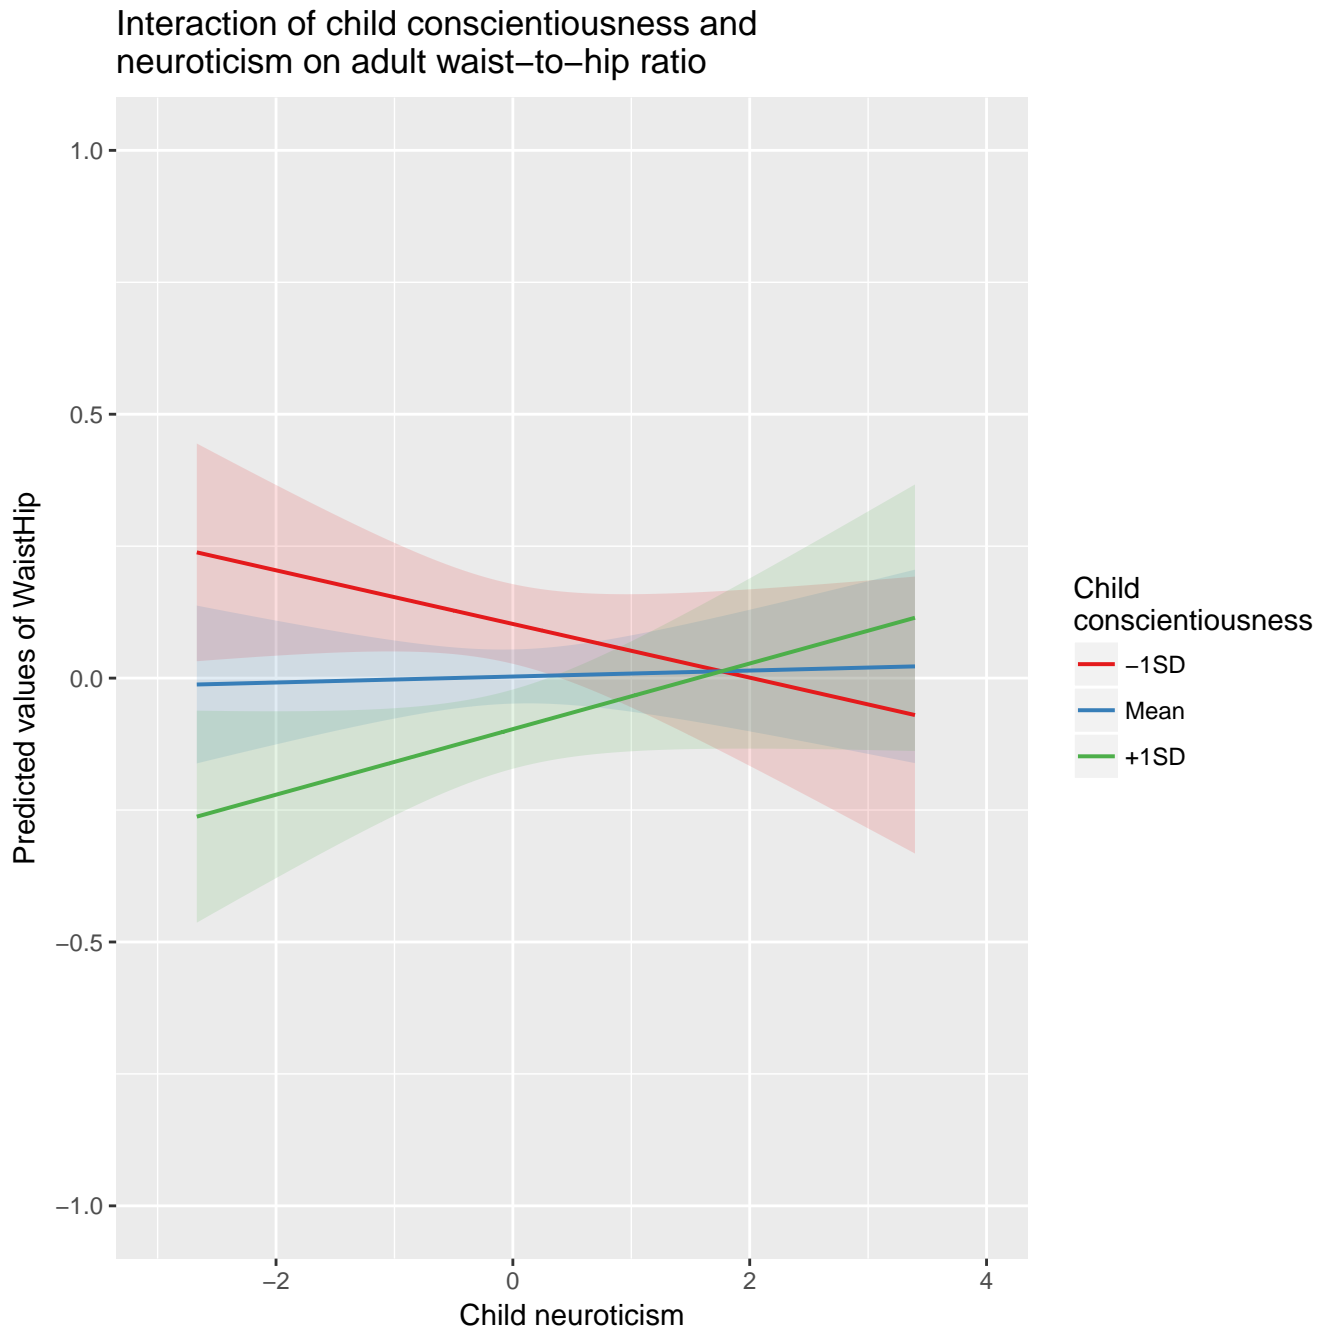

## 6 Analyses: Facets of neuroticism

### 6.1 Regression estimates - SRH and Outcomes

```
facets.srh <- 'SelfRatedHealth ~ g.Neur + Anxiety + Anger +
Depression + SelfConsciousness + Immoderation +
Vulnerability + gender + Q6_age_c'

facets.srh <- paste(facet.model, facets.srh, sep="\n")
```

```

facets.srh <- cfa(facets.srh, ori.health)

facets.heart <- 'HeartCondition ~ g.Neur + Anxiety +
  Anger + Depression + SelfConsciousness +
  Immoderation + Vulnerability + gender + Q6_age_c'

facets.heart <- paste(facet.model, facets.heart, sep="\n")
facets.heart <- cfa(facets.heart, ori.health)

facets.cond <- 'NumberChronic ~ g.Neur + Anxiety + Anger +
  Depression + SelfConsciousness + Immoderation +
  Vulnerability + gender + Q6_age_c '

facets.cond <- paste(facet.model, facets.cond, sep="\n")
facets.cond <- cfa(facets.cond, ori.health)

```

```

semTable(object = facets.srh, file="tables/facetsSRH.tex", longtable = T)
semTable(facets.heart, file="tables/facetsHeart.tex", longtable = T)
semTable(facets.cond, file="tables/facetsCond.tex", longtable = T)

```

| Predictor         | Self Rated Health        | Heart Condition        | Number Chronic         |
|-------------------|--------------------------|------------------------|------------------------|
| g.Neur            | -0.55*<br>(-0.72, -0.38) | -0.01<br>(-0.06, 0.05) | 0.1<br>(-0.05, 0.24)   |
| Anxiety           | -0.58<br>(-1.92, 0.77)   | 0.02<br>(-0.28, 0.32)  | 0.3<br>(-0.52, 1.12)   |
| Anger             | 0.01<br>(-0.25, 0.27)    | 0<br>(-0.07, 0.06)     | 0.02<br>(-0.16, 0.2)   |
| Depression        | 0.7<br>(-0.46, 1.86)     | 0.1<br>(-0.13, 0.33)   | -0.16<br>(-0.78, 0.46) |
| SelfConsciousness | -0.25<br>(-0.57, 0.07)   | 0.05<br>(-0.03, 0.14)  | 0.16<br>(-0.09, 0.4)   |
| Immoderation      | -0.68*<br>(-1.17, -0.2)  | 0.02<br>(-0.09, 0.12)  | 0.48*<br>(0.15, 0.8)   |
| Vulnerability     | 4.63<br>(-4.93, 14.19)   | 0.64<br>(-1.64, 2.92)  | -1.52<br>(-7.05, 4.02) |

Table 23: Regression estimates from structural equation models predicting self-rated health and outcomes from bifactor model

## 6.2 Regression estimates - Behavior

```

facets.cige <- 'Cigarettes_Ever ~ g.Neur + Anxiety +
  Anger + Depression + SelfConsciousness +
  Immoderation + Vulnerability + gender + Q6_age_c
'

facets.cige <- paste(facet.model, facets.cige, sep="\n")
facets.cige <- cfa(facets.cige, ori.health)

facets.cig <- 'Cigarettes ~ g.Neur + Anxiety + Anger +
  Depression + SelfConsciousness + Immoderation +
  Vulnerability + gender + Q6_age_c
'

facets.cig <- paste(facet.model, facets.cig, sep="\n")
facets.cig <- cfa(facets.cig, ori.health)

facets.alce <- 'Alcohol_Ever ~ g.Neur + Anxiety + Anger +
  Depression + SelfConsciousness + Immoderation +
  Vulnerability + gender + Q6_age_c
'

facets.alce <- paste(facet.model, facets.alce, sep="\n")
facets.alce <- cfa(facets.alce, ori.health, ordered = "Alcohol_Ever")

```

```

facets.alcy <- 'Alcohol_Days ~ g.Neur + Anxiety + Anger +
  Depression + SelfConsciousness + Immoderation +
  Vulnerability + gender + Q6_age_c '

facets.alcy <- paste(facet.model, facets.alcy, sep="\n")
facets.alcy <- cfa(facets.alcy, ori.health)

facets.alck <- 'Alcohol_Drinks ~ g.Neur + Anxiety + Anger +
  Depression + SelfConsciousness + Immoderation +
  Vulnerability + gender + Q6_age_c '

facets.alck <- paste(facet.model, facets.alck, sep="\n")
facets.alck <- cfa(facets.alck, ori.health)

facets.alcb <- 'Alcohol_Binge ~ g.Neur + Anxiety + Anger +
  Depression + SelfConsciousness + Immoderation +
  Vulnerability + gender + Q6_age_c '

facets.alcb <- paste(facet.model, facets.alcb, sep="\n")
facets.alcb <- cfa(facets.alcb, ori.health)

```

```

semTable(facets.cige, file="tables/facetsCigE.tex", longtable = T)
semTable(facets.cig, file="tables/facetsCig.tex", longtable = T)
semTable(facets.alce, file="tables/facetsAlcE.tex", longtable = T)
semTable(facets.alcy, file="tables/facetsAlcY.tex", longtable = T)
semTable(facets.alck, file="tables/facetsAlcK.tex", longtable = T)
semTable(facets.alcb, file="tables/facetsAlcB.tex", longtable = T)

```

| Predictor         | Cigarettes ever        | Number of cigarettes   | Alcohol ever           | Alcohol days           | Alcohol drinks         | Binge drinking         |
|-------------------|------------------------|------------------------|------------------------|------------------------|------------------------|------------------------|
| g.Neur            | 0.06<br>(-0.02, 0.14)  | 0.18*<br>(0.04, 0.32)  | 0.31<br>(-0.34, 0.96)  | -0.08<br>(-0.4, 0.24)  | 0.14<br>(-0.11, 0.38)  | 0.24<br>(0, 0.47)      |
| Anxiety           | -0.1<br>(-0.51, 0.31)  | -0.25<br>(-0.97, 0.47) | 2.59<br>(-4.05, 9.23)  | -0.41<br>(-2.34, 1.52) | -1.05<br>(-2.9, 0.8)   | -1.3<br>(-3.41, 0.82)  |
| Anger             | 0.03<br>(-0.07, 0.12)  | 0.08<br>(-0.07, 0.24)  | 0.02<br>(-0.41, 0.46)  | 0.18<br>(-0.26, 0.63)  | 0.17<br>(-0.21, 0.54)  | 0.17<br>(-0.25, 0.58)  |
| Depression        | -0.13<br>(-0.42, 0.16) | 0.04<br>(-0.49, 0.58)  | 0.72<br>(-0.72, 2.16)  | 0.42<br>(-1.18, 2.02)  | 0.49<br>(-1.05, 2.03)  | 0.66<br>(-1.16, 2.48)  |
| SelfConsciousness | -0.02<br>(-0.14, 0.11) | -0.05<br>(-0.26, 0.16) | 1.44<br>(-1.65, 4.53)  | 0.05<br>(-0.44, 0.54)  | -0.18<br>(-0.61, 0.25) | -0.16<br>(-0.6, 0.29)  |
| Immoderation      | 0.14<br>(-0.02, 0.3)   | -0.01<br>(-0.28, 0.26) | 2.11<br>(-2.49, 6.7)   | 0.05<br>(-0.66, 0.75)  | 0.28<br>(-0.35, 0.91)  | 0.37<br>(-0.3, 1.04)   |
| Vulnerability     | -1.24<br>(-5.02, 2.54) | -1.02<br>(-6.49, 4.45) | -4.12<br>(-13.64, 5.4) | 3.99<br>(-9.01, 16.99) | 4.84<br>(-8.07, 17.76) | 6.61<br>(-8.91, 22.13) |

Table 24: Regression estimates from structural equation models predicting risk behaviors from bifactor model

```

facets.exst <- 'Exercise_Stren ~ g.Neur + Anxiety + Anger +
  Depression + SelfConsciousness + Immoderation +
  Vulnerability + gender + Q7_age_c
'

facets.exst <- paste(facet.model, facets.exst, sep="\n")
facets.exst <- cfa(facets.exst, ori.health)

facets.exmr <- 'Exercise_Moder ~ g.Neur + Anxiety + Anger +
  Depression + SelfConsciousness + Immoderation +
  Vulnerability + gender + Q7_age_c
'

facets.exmr <- paste(facet.model, facets.exmr, sep="\n")
facets.exmr <- cfa(facets.exmr, ori.health)

facets.exml <- 'Exercise_Mild ~ g.Neur + Anxiety + Anger +
  Depression + SelfConsciousness + Immoderation +
  Vulnerability + gender + Q7_age_c
'

```

```

facets.exml <- paste(facet.model, facets.exml, sep="\n")
facets.exml <- cfa(facets.exml, ori.health)

facets.floss <- 'Flossing ~ g.Neur + Anxiety + Anger +
                Depression + SelfConsciousness + Immoderation +
                Vulnerability + gender + Q7_age_c
                ,

facets.floss <- paste(facet.model, facets.floss, sep="\n")
facets.floss <- cfa(facets.floss, ori.health)

```

```

semTable(facets.exst, file="tables/facetsExSt.tex", longtable = T)
semTable(facets.exmr, file="tables/facetsExMr.tex", longtable = T)
semTable(facets.exml, file="tables/facetsExMl.tex", longtable = T)
semTable(facets.floss, file="tables/facetsFloss.tex", longtable = T)

```

| Predictor         | Strenuous exercise     | Moderate exercise        | Mild exercise            | Flossing               |
|-------------------|------------------------|--------------------------|--------------------------|------------------------|
| g.Neur            | -0.28<br>(-0.61, 0.05) | -0.02<br>(-0.3, 0.26)    | -0.1<br>(-0.38, 0.18)    | 0.05<br>(-0.23, 0.33)  |
| Anxiety           | -0.33<br>(-2.03, 1.37) | 0.8<br>(-1.17, 2.78)     | 0.41<br>(-1, 1.83)       | -0.15<br>(-1.55, 1.26) |
| Anger             | 0.09<br>(-0.14, 0.33)  | 0.01<br>(-0.23, 0.25)    | 0.01<br>(-0.19, 0.21)    | -0.08<br>(-0.28, 0.11) |
| Depression        | -0.33<br>(-0.73, 0.06) | -0.42*<br>(-0.82, -0.03) | -0.33<br>(-0.67, 0)      | 0.29<br>(-0.05, 0.63)  |
| SelfConsciousness | -0.25<br>(-0.54, 0.05) | -0.05<br>(-0.33, 0.24)   | -0.11<br>(-0.35, 0.13)   | 0.05<br>(-0.19, 0.29)  |
| Immoderation      | -0.36<br>(-0.8, 0.08)  | -0.44<br>(-0.89, 0.01)   | -0.41*<br>(-0.79, -0.03) | 0.37*<br>(0.01, 0.73)  |
| Vulnerability     | 0.63<br>(-1.39, 2.64)  | -0.9<br>(-3.28, 1.48)    | -0.28<br>(-1.95, 1.4)    | 0.29<br>(-1.4, 1.97)   |

Table 25: Regression estimates from structural equation models predicting healthy behaviors from bifactor model

### 6.3 Regression estimates - Clinic outcomes

```

facets.blsg <- 'BloodSugar ~ g.Neur + Anxiety + Anger +
                Depression + SelfConsciousness + Immoderation +
                Vulnerability + gender + clinic1_age_c
                ,

facets.blsg <- paste(facet.model, facets.blsg, sep="\n")
facets.blsg <- cfa(facets.blsg, ori.health)

facets.ratio <- 'ChoHDLratio ~ g.Neur + Anxiety + Anger +
                Depression + SelfConsciousness + Immoderation +
                Vulnerability + gender + clinic1_age_c
                ,

facets.ratio <- paste(facet.model, facets.ratio, sep="\n")
facets.ratio <- cfa(facets.ratio, ori.health)

facets.bp <- 'SysBP ~ g.Neur + Anxiety + Anger +
                Depression + SelfConsciousness + Immoderation +
                Vulnerability + gender + clinic1_age_c
                ,

facets.bp <- paste(facet.model, facets.bp, sep="\n")
facets.bp <- cfa(facets.bp, ori.health)

facets.wh <- 'WaistHip ~ g.Neur + Anxiety + Anger +
                Depression + SelfConsciousness + Immoderation +
                Vulnerability + gender + clinic1_age_c

```

```
Depression ~ 0*Depression'

facets.wh <- paste(facet.model, facets.wh, sep="\n")
facets.wh <- cfa(facets.wh, ori.health)
```

```
semTable(facets.bls, file="tables/facetsBls.tex", longtable = T)
semTable(facets.ratio, file="tables/facetsRatio.tex", longtable = T)
semTable(facets.bp, file="tables/facetsBP.tex", longtable = T)
semTable(facets.wh, file="tables/facetsWh.tex", longtable = T)
```

| Predictor         | Blood sugar            | ChoHDL ratio           | Blood pressure        | Waist-hip ratio        |
|-------------------|------------------------|------------------------|-----------------------|------------------------|
| g.Neur            | 0.26<br>(-0.03, 0.54)  | -0.03<br>(-0.32, 0.26) | 0.05<br>(-0.2, 0.3)   | 0.34*<br>(0.09, 0.59)  |
| Anxiety           | 1.2<br>(-0.81, 3.22)   | 1.03<br>(-0.67, 2.73)  | 0.2<br>(-0.84, 1.25)  | -0.01<br>(-0.97, 0.96) |
| Anger             | -0.03<br>(-0.24, 0.17) | -0.05<br>(-0.25, 0.15) | 0.08<br>(-0.06, 0.22) | -0.01<br>(-0.17, 0.15) |
| Depression        | -0.71<br>(-1.8, 0.38)  | -0.26<br>(-1.12, 0.61) | -0.4<br>(-1.02, 0.22) | 0.35<br>(-0.2, 0.9)    |
| SelfConsciousness | 0<br>(-0.36, 0.36)     | 0<br>(-0.3, 0.31)      | 0.01<br>(-0.23, 0.24) | 0.24<br>(-0.05, 0.53)  |
| Immoderation      | 0.36<br>(-0.15, 0.87)  | 0.6*<br>(0.08, 1.11)   | 0.32<br>(-0.04, 0.68) | 0.99*<br>(0.43, 1.55)  |
| Vulnerability     | -1.55<br>(-3.97, 0.88) | -1.36<br>(-3.36, 0.64) | -0.64<br>(-1.98, 0.7) | -0.13<br>(-1.33, 1.07) |

Table 26: Regression estimates from structural equation models predicting clinical outcomes from bifactor model

## 7 Analyses: Neuroticism by situation (max income)

### 7.1 Regression estimates - SRH and Outcomes

```
set.seed(1959)
inc.srh <- lm(SelfRatedHealth ~ Neur_c*income_c + gender + Q6_age_c,
             data = ori.health)
inc.heart <- glm(HeartCondition ~ Neur_c*income_c + gender + Q6_age_c,
               data = ori.health,
               family = "binomial")
inc.cond <- glm(NumberChronic ~ Neur_c*income_c + gender + Q6_age_c,
               data = ori.health,
               family = "poisson")
```

### 7.2 Regression estimates - Behavior

```
inc.cige <- glm(Cigarettes_Ever ~ Neur_c*income_c + gender + Q6_age_c,
               data = ori.health,
               family = "binomial")
inc.cig <- glm.nb(Cigarettes ~ Neur_c*income_c + gender + Q6_age_c,
                 data = ori.health)
inc.alce <- glm(Alcohol_Ever ~ Neur_c*income_c + gender + Q6_age_c,
               data = ori.health,
               family = "binomial")
inc.alcy <- glm.nb(Alcohol_Days ~ Neur_c*income_c + gender + Q6_age_c,
                  data = ori.health)
inc.alck <- glm.nb(Alcohol_Drinks ~ Neur_c*income_c + gender + Q6_age_c,
                  data = ori.health)
inc.alcb <- glm.nb(Alcohol_Binge ~ Neur_c*income_c + gender + Q6_age_c,
                  data = ori.health)
```



|                         | <i>Dependent variable:</i>  |                             |                             |
|-------------------------|-----------------------------|-----------------------------|-----------------------------|
|                         | SelfRatedHealth             | HeartCondition              | NumberChronic               |
|                         | <i>OLS</i>                  | <i>logistic</i>             | <i>Poisson</i>              |
|                         | (1)                         | (2)                         | (3)                         |
| Neur.c                  | -0.544*<br>(-0.698, -0.390) | 0.072<br>(-0.485, 0.630)    | 0.166<br>(-0.058, 0.391)    |
| income.c                | 0.178*<br>(0.091, 0.265)    | -0.158<br>(-0.469, 0.153)   | -0.090<br>(-0.217, 0.037)   |
| gender                  | -0.116*<br>(-0.202, -0.030) | 0.337*<br>(0.021, 0.652)    | -0.068<br>(-0.195, 0.060)   |
| Q6_age.c                | -0.040<br>(-0.122, 0.043)   | 0.304<br>(-0.007, 0.616)    | 0.128*<br>(0.005, 0.252)    |
| Neur.c:income.c         | -0.017<br>(-0.165, 0.131)   | 0.033<br>(-0.495, 0.561)    | 0.050<br>(-0.161, 0.261)    |
| Constant                | 0.085*<br>(0.002, 0.169)    | -2.038*<br>(-2.352, -1.724) | -0.493*<br>(-0.618, -0.368) |
| Observations            | 416                         | 414                         | 418                         |
| R <sup>2</sup>          | 0.151                       |                             |                             |
| Adjusted R <sup>2</sup> | 0.141                       |                             |                             |
| Log Likelihood          |                             | -148.549                    | -437.842                    |
| Akaike Inf. Crit.       |                             | 309.098                     | 887.684                     |
| Residual Std. Error     | 0.863 (df = 410)            |                             |                             |
| F Statistic             | 14.577* (df = 5; 410)       |                             |                             |

*Note:* \*  $p < .05$

Table 27: Interaction of socioeconomic status and neuroticism predicting self-rated health and outcomes

|                   | <i>Dependent variable:</i>                |                                               |                                        |                                                 |                                                   |                                                  |
|-------------------|-------------------------------------------|-----------------------------------------------|----------------------------------------|-------------------------------------------------|---------------------------------------------------|--------------------------------------------------|
|                   | Cigarettes_Ever<br><i>logistic</i><br>(1) | Cigarettes<br><i>negative binomial</i><br>(2) | Alcohol_Ever<br><i>logistic</i><br>(3) | Alcohol_Days<br><i>negative binomial</i><br>(4) | Alcohol_Drinks<br><i>negative binomial</i><br>(5) | Alcohol_Binge<br><i>negative binomial</i><br>(6) |
| Neur_c            | 0.338<br>(-0.024, 0.701)                  | 0.281<br>(-0.460, 1.021)                      | 0.641*<br>(0.084, 1.198)               | 0.007<br>(-0.223, 0.238)                        | 0.086<br>(-0.126, 0.298)                          | 0.312<br>(-0.291, 0.915)                         |
| income_c          | -0.160<br>(-0.364, 0.044)                 | -0.577*<br>(-0.988, -0.165)                   | 0.381*<br>(0.081, 0.681)               | 0.233*<br>(0.102, 0.363)                        | 0.088<br>(-0.031, 0.207)                          | -0.002<br>(-0.337, 0.334)                        |
| gender            | 0.148<br>(-0.055, 0.350)                  | 0.096<br>(-0.311, 0.504)                      | 0.070<br>(-0.222, 0.362)               | 0.085<br>(-0.043, 0.214)                        | 0.283*<br>(0.164, 0.401)                          | 0.833*<br>(0.493, 1.172)                         |
| Q6_age_c          | 0.120<br>(-0.074, 0.314)                  | -0.159<br>(-0.556, 0.238)                     | 0.151<br>(-0.125, 0.428)               | -0.028<br>(-0.150, 0.095)                       | -0.072<br>(-0.186, 0.041)                         | -0.026<br>(-0.350, 0.299)                        |
| Neur_c:income_c   | 0.071<br>(-0.278, 0.420)                  | 0.268<br>(-0.432, 0.969)                      | 0.075<br>(-0.434, 0.584)               | 0.044<br>(-0.182, 0.270)                        | 0.194<br>(-0.015, 0.404)                          | 0.617*<br>(0.011, 1.223)                         |
| Constant          | -0.089<br>(-0.285, 0.107)                 | -1.525*<br>(-1.925, -1.126)                   | 1.833*<br>(1.526, 2.140)               | 0.542*<br>(0.417, 0.668)                        | 0.201*<br>(0.086, 0.317)                          | -0.974*<br>(-1.301, -0.647)                      |
| Observations      | 417                                       | 416                                           | 399                                    | 414                                             | 414                                               | 415                                              |
| Log Likelihood    | -284.237                                  | -209.278                                      | -163.550                               | -743.837                                        | -626.457                                          | -301.343                                         |
| $\theta$          |                                           | 0.087* (0.021)                                |                                        | 0.948* (0.131)                                  | 1.778* (0.357)                                    | 0.127* (0.024)                                   |
| Akaike Inf. Crit. | 580.474                                   | 430.557                                       | 339.100                                | 1,499.674                                       | 1,264.914                                         | 614.685                                          |

Note:

\*  $p < .05$

Table 28: Interaction of socioeconomic status and neuroticism predicting unhealthy behaviors

```
pdf("plots/int_income_cig.pdf")
sjp.int(inc.cig, type="eff", mdr.t.values = "meansd", swap.pred = T,
        legend.labels = c("-1SD", "Mean", "+1SD"), show.ci = T,
        axis.title = "Adult neuroticism", legend.title = "Adult maximum income",
        title = "Interaction of adult neuroticism and income on number of cigarettes smoked")
dev.off()

## pdf
## 2
```

Interaction of adult neuroticism and income on number of cigarettes smoked

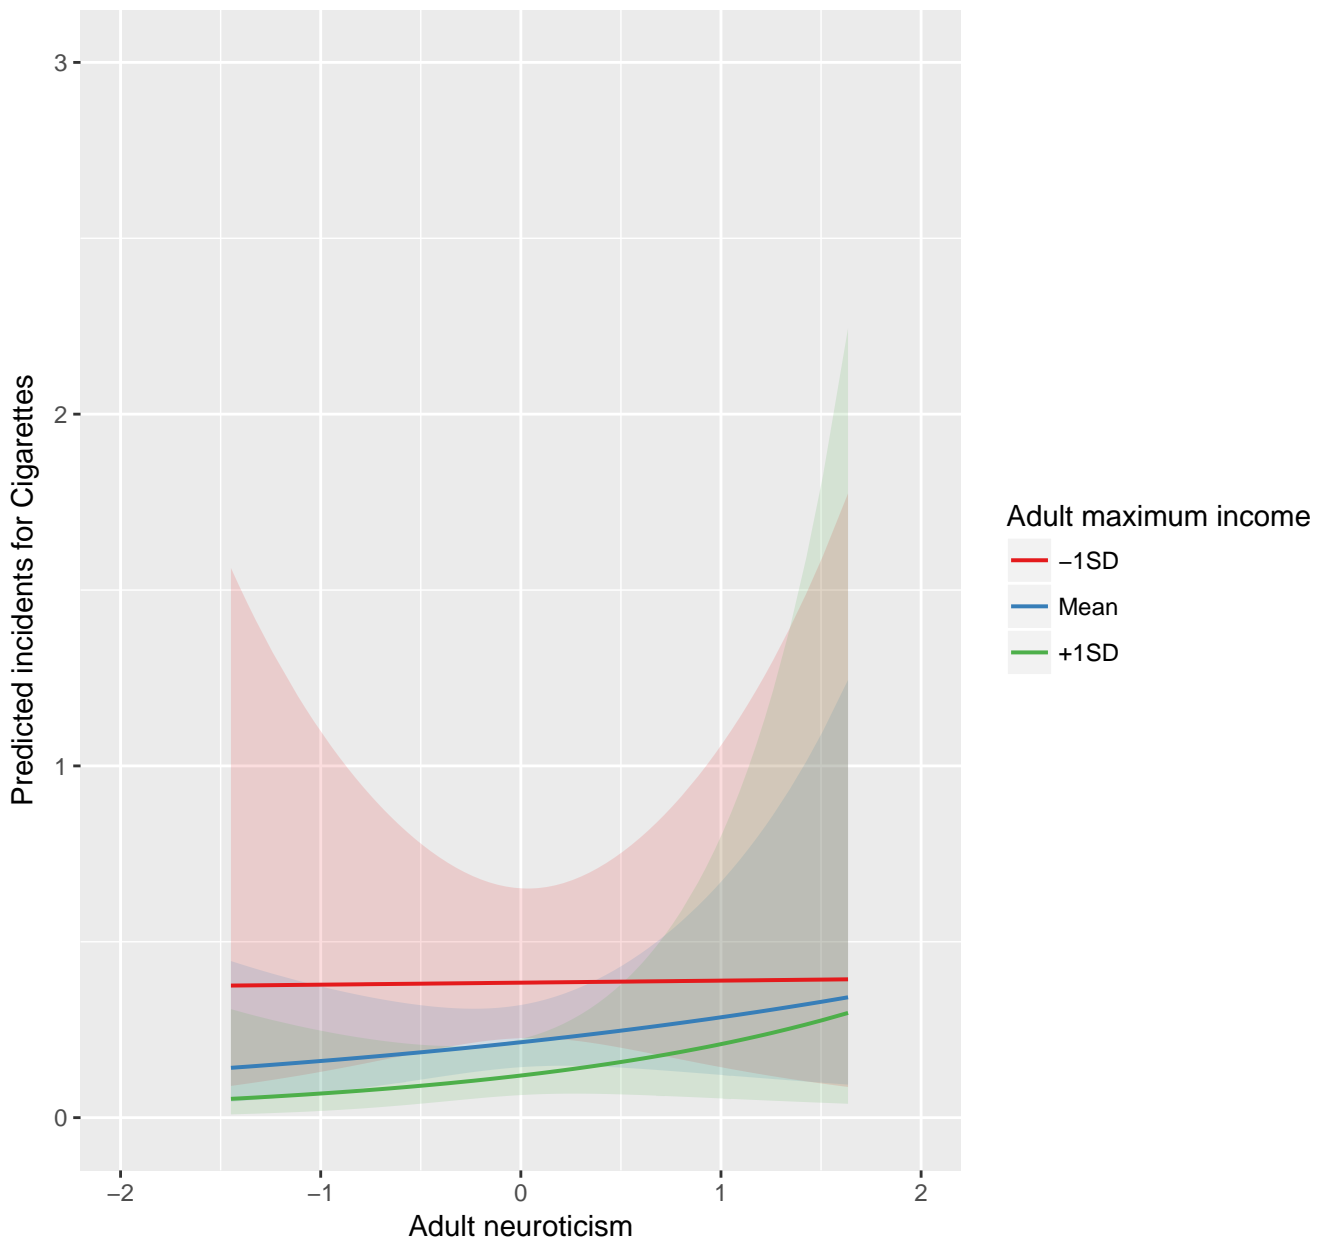

```

inc.exst <- glm.nb(Exercise_Stren ~ Neur_c*income_c + gender + Q7_age_c,
  data = ori.health)
inc.exmr <- lm(Exercise_Moder ~ Neur_c*income_c + gender + Q7_age_c,
  data = ori.health)
inc.exml <- lm(Exercise_Mild ~ Neur_c*income_c + gender + Q7_age_c,
  data = ori.health)
inc.floss <- lm(Flossing ~ Neur_c*income_c + gender + Q7_age_c,
  data = ori.health)

```

|                         | <i>Dependent variable:</i>                 |                              |                             |                             |
|-------------------------|--------------------------------------------|------------------------------|-----------------------------|-----------------------------|
|                         | Exercise_Stren<br><i>negative binomial</i> | Exercise_Moder<br><i>OLS</i> | Exercise_Mild<br><i>OLS</i> | Flossing<br><i>OLS</i>      |
|                         | (1)                                        | (2)                          | (3)                         | (4)                         |
| Neur_c                  | -0.094<br>(-0.212, 0.024)                  | -0.082<br>(-0.238, 0.075)    | -0.101<br>(-0.261, 0.058)   | 0.033<br>(-0.122, 0.187)    |
| income_c                | 0.080*<br>(0.013, 0.147)                   | -0.012<br>(-0.102, 0.078)    | -0.021<br>(-0.111, 0.069)   | -0.151*<br>(-0.240, -0.063) |
| gender                  | 0.043<br>(-0.021, 0.108)                   | 0.024<br>(-0.062, 0.111)     | -0.006<br>(-0.093, 0.082)   | 0.153*<br>(0.067, 0.239)    |
| Q7_age_c                | -0.011<br>(-0.073, 0.051)                  | 0.017<br>(-0.067, 0.101)     | 0.064<br>(-0.021, 0.149)    | -0.081<br>(-0.164, 0.003)   |
| Neur_c:income_c         | -0.043<br>(-0.161, 0.075)                  | 0.068<br>(-0.088, 0.224)     | 0.090<br>(-0.070, 0.249)    | -0.088<br>(-0.242, 0.066)   |
| Constant                | 0.646*<br>(0.582, 0.710)                   | -0.019<br>(-0.104, 0.066)    | -0.025<br>(-0.110, 0.061)   | -0.024<br>(-0.107, 0.060)   |
| Observations            | 514                                        | 511                          | 517                         | 517                         |
| R <sup>2</sup>          |                                            | 0.005                        | 0.011                       | 0.050                       |
| Adjusted R <sup>2</sup> |                                            | -0.005                       | 0.001                       | 0.041                       |
| Log Likelihood          | -782.351                                   |                              |                             |                             |
| $\theta$                | 47,235.070 (299,275.200)                   |                              |                             |                             |
| Akaike Inf. Crit.       | 1,576.703                                  |                              |                             |                             |
| Residual Std. Error     |                                            | 0.969 (df = 505)             | 0.980 (df = 511)            | 0.959 (df = 511)            |
| F Statistic             |                                            | 0.462 (df = 5; 505)          | 1.085 (df = 5; 511)         | 5.410* (df = 5; 511)        |

*Note:* \*  $p < .05$

Table 29: Interaction of socioeconomic status and sesoticism predicting healthy behaviors

### 7.3 Regression estimates - Clinic outcomes

```

inc.blsg <- lm(BloodSugar ~ Neur_c*income_c + gender + clinic1_age_c,
  data = ori.health)
inc.ratio <- lm(ChoHDLratio ~ Neur_c*income_c + gender + clinic1_age_c,
  data = ori.health)
inc.bp <- lm(SysBP ~ Neur_c*income_c + gender + clinic1_age_c,
  data = ori.health)
inc.wh <- lm(WaistHip ~ Neur_c*income_c + gender + clinic1_age_c,
  data = ori.health)

```

|                         | <i>Dependent variable:</i> |                             |                           |                             |
|-------------------------|----------------------------|-----------------------------|---------------------------|-----------------------------|
|                         | BloodSugar<br>(1)          | ChoHDLratio<br>(2)          | SysBP<br>(3)              | WaistHip<br>(4)             |
| Neur_c                  | 0.181*<br>(0.001, 0.361)   | 0.003<br>(-0.146, 0.153)    | 0.009<br>(-0.159, 0.177)  | 0.178*<br>(0.035, 0.322)    |
| income_c                | -0.088<br>(-0.190, 0.014)  | -0.120*<br>(-0.206, -0.035) | -0.033<br>(-0.127, 0.060) | -0.091*<br>(-0.171, -0.012) |
| gender                  | 0.158*<br>(0.060, 0.256)   | 0.282*<br>(0.200, 0.364)    | 0.154*<br>(0.063, 0.245)  | 0.703*<br>(0.626, 0.781)    |
| clinic1_age_c           | 0.085<br>(-0.018, 0.189)   | 0.083<br>(-0.004, 0.169)    | 0.023<br>(-0.073, 0.118)  | 0.140*<br>(0.059, 0.222)    |
| Neur_c:income_c         | 0.014<br>(-0.159, 0.186)   | 0.078<br>(-0.066, 0.222)    | 0.113<br>(-0.048, 0.275)  | 0.116<br>(-0.021, 0.254)    |
| Constant                | -0.017<br>(-0.114, 0.080)  | 0.010<br>(-0.071, 0.091)    | -0.041<br>(-0.131, 0.049) | 0.051<br>(-0.026, 0.127)    |
| Observations            | 372                        | 371                         | 391                       | 389                         |
| R <sup>2</sup>          | 0.047                      | 0.122                       | 0.032                     | 0.474                       |
| Adjusted R <sup>2</sup> | 0.034                      | 0.110                       | 0.020                     | 0.467                       |
| Residual Std. Error     | 0.939 (df = 366)           | 0.783 (df = 365)            | 0.888 (df = 385)          | 0.753 (df = 383)            |
| F Statistic             | 3.611* (df = 5; 366)       | 10.182* (df = 5; 365)       | 2.562* (df = 5; 385)      | 68.927* (df = 5; 383)       |

*Note:* \*  $p < .05$

Table 30: Interaction of socioeconomic status and neuroticism predicting clinic measures

## 8 Analyses: Neuroticism by situation (education)

### 8.1 Regression estimates - SRH and Outcomes

```
set.seed(1959)
edu.srh <- lm(SelfRatedHealth ~ Neur_c*highgrd_c + gender + Q6_age_c,
             data = ori.health)
edu.heart <- glm(HeartCondition ~ Neur_c*highgrd_c + gender + Q6_age_c,
              data = ori.health,
              family = "binomial")
edu.cond <- glm(NumberChronic ~ Neur_c*highgrd_c + gender + Q6_age_c,
              data = ori.health,
              family = "poisson")
```

### 8.2 Regression estimates - Behavior

```
edu.cige <- glm(Cigarettes_Ever ~ Neur_c*highgrd_c + gender + Q6_age_c,
              data = ori.health,
              family = "binomial")
edu.cig <- glm.nb(Cigarettes ~ Neur_c*highgrd_c + gender + Q6_age_c,
                data = ori.health)
edu.alce <- glm(Alcohol_Ever ~ Neur_c*highgrd_c + gender + Q6_age_c,
              data = ori.health,
              family = "binomial")
edu.alcy <- glm.nb(Alcohol_Days ~ Neur_c*highgrd_c + gender + Q6_age_c,
                data = ori.health)
edu.alck <- glm.nb(Alcohol_Drinks ~ Neur_c*highgrd_c + gender + Q6_age_c,
                data = ori.health)
edu.alcb <- glm.nb(Alcohol_Binge ~ Neur_c*highgrd_c + gender + Q6_age_c,
                data = ori.health)
```

|                         | <i>Dependent variable:</i>  |                             |                             |
|-------------------------|-----------------------------|-----------------------------|-----------------------------|
|                         | SelfRatedHealth             | HeartCondition              | NumberChronic               |
|                         | <i>OLS</i>                  | <i>logistic</i>             | <i>Poisson</i>              |
|                         | (1)                         | (2)                         | (3)                         |
| Neur.c                  | -0.552*<br>(-0.689, -0.416) | 0.231<br>(-0.245, 0.706)    | 0.243*<br>(0.064, 0.421)    |
| highgrd.c               | 0.215*<br>(0.134, 0.297)    | -0.007<br>(-0.293, 0.278)   | -0.129*<br>(-0.236, -0.022) |
| gender                  | -0.067<br>(-0.140, 0.006)   | 0.231<br>(-0.023, 0.484)    | -0.090<br>(-0.191, 0.010)   |
| Q6_age.c                | -0.030<br>(-0.104, 0.044)   | 0.146<br>(-0.113, 0.406)    | 0.041<br>(-0.060, 0.143)    |
| Neur.c:highgrd.c        | -0.004<br>(-0.151, 0.144)   | -0.046<br>(-0.556, 0.464)   | -0.169<br>(-0.353, 0.014)   |
| Constant                | -0.005<br>(-0.079, 0.070)   | -1.990*<br>(-2.254, -1.727) | -0.405*<br>(-0.509, -0.301) |
| Observations            | 576                         | 573                         | 579                         |
| R <sup>2</sup>          | 0.161                       |                             |                             |
| Adjusted R <sup>2</sup> | 0.154                       |                             |                             |
| Log Likelihood          |                             | -210.042                    | -641.898                    |
| Akaike Inf. Crit.       |                             | 432.084                     | 1,295.797                   |
| Residual Std. Error     | 0.887 (df = 570)            |                             |                             |
| F Statistic             | 21.941* (df = 5; 570)       |                             |                             |

*Note:* \*  $p < .05$

Table 31: Interaction of socioeconomic status and neuroticism predicting self-rated health and outcomes

|                   | <i>Dependent variable:</i>         |                                        |                                 |                                          |                                            |                                           |
|-------------------|------------------------------------|----------------------------------------|---------------------------------|------------------------------------------|--------------------------------------------|-------------------------------------------|
|                   | Cigarettes_Ever<br><i>logistic</i> | Cigarettes<br><i>negative binomial</i> | Alcohol_Ever<br><i>logistic</i> | Alcohol_Days<br><i>negative binomial</i> | Alcohol_Drinks<br><i>negative binomial</i> | Alcohol_Binge<br><i>negative binomial</i> |
|                   | (1)                                | (2)                                    | (3)                             | (4)                                      | (5)                                        | (6)                                       |
| Neur_c            | 0.186<br>(-0.135, 0.507)           | 0.366<br>(-0.167, 0.899)               | 0.400<br>(-0.060, 0.861)        | 0.032<br>(-0.174, 0.238)                 | 0.071<br>(-0.119, 0.260)                   | 0.475<br>(-0.017, 0.968)                  |
| highgrd_c         | -0.537*<br>(-0.737, -0.337)        | -0.694*<br>(-1.000, -0.388)            | -0.213<br>(-0.498, 0.071)       | 0.175*<br>(0.051, 0.300)                 | -0.064<br>(-0.175, 0.047)                  | -0.307*<br>(-0.594, -0.019)               |
| gender            | 0.062<br>(-0.107, 0.232)           | 0.030<br>(-0.264, 0.323)               | 0.200<br>(-0.043, 0.443)        | 0.115*<br>(0.006, 0.224)                 | 0.300*<br>(0.199, 0.401)                   | 0.733*<br>(0.467, 1.000)                  |
| Q6_age_c          | 0.124<br>(-0.047, 0.296)           | -0.110<br>(-0.410, 0.191)              | 0.234<br>(-0.002, 0.470)        | 0.006<br>(-0.104, 0.115)                 | -0.025<br>(-0.128, 0.077)                  | -0.074<br>(-0.344, 0.196)                 |
| Neur_c:highgrd_c  | -0.262<br>(-0.633, 0.110)          | -0.120<br>(-0.674, 0.434)              | -0.039<br>(-0.555, 0.476)       | -0.018<br>(-0.244, 0.208)                | -0.017<br>(-0.219, 0.184)                  | -0.109<br>(-0.631, 0.413)                 |
| Constant          | 0.030<br>(-0.144, 0.205)           | -1.376*<br>(-1.673, -1.080)            | 1.832*<br>(1.572, 2.092)        | 0.533*<br>(0.420, 0.645)                 | 0.233*<br>(0.129, 0.336)                   | -0.787*<br>(-1.058, -0.516)               |
| Observations      | 577                                | 577                                    | 548                             | 573                                      | 572                                        | 573                                       |
| Log Likelihood    | -382.106                           | -328.263                               | -227.459                        | -1,032.245                               | -878.426                                   | -452.590                                  |
| $\theta$          |                                    | 0.125* (0.025)                         |                                 | 0.861* (0.098)                           | 1.446* (0.221)                             | 0.133* (0.020)                            |
| Akaike Inf. Crit. | 776.212                            | 668.527                                | 466.917                         | 2,076.491                                | 1,768.852                                  | 917.179                                   |

Note:

\*  $p < .05$

Table 32: Interaction of socioeconomic status and neuroticism predicting unhealthy behaviors

```

edu.exst <- glm.nb(Exercise_Stren ~ Neur_c*highgrd_c + gender + Q7_age_c,
  data = ori.health)
edu.exmr <- lm(Exercise_Moder ~ Neur_c*highgrd_c + gender + Q7_age_c,
  data = ori.health)
edu.exml <- lm(Exercise_Mild ~ Neur_c*highgrd_c + gender + Q7_age_c,
  data = ori.health)
edu.floss <- lm(Flossing ~ Neur_c*highgrd_c + gender + Q7_age_c,
  data = ori.health)

```

|                         | <i>Dependent variable:</i>                 |                              |                             |                             |
|-------------------------|--------------------------------------------|------------------------------|-----------------------------|-----------------------------|
|                         | Exercise_Stren<br><i>negative binomial</i> | Exercise_Moder<br><i>OLS</i> | Exercise_Mild<br><i>OLS</i> | Flossing<br><i>OLS</i>      |
|                         | (1)                                        | (2)                          | (3)                         | (4)                         |
| Neur_c                  | -0.109<br>(-0.221, 0.003)                  | -0.114<br>(-0.265, 0.038)    | -0.125<br>(-0.276, 0.026)   | 0.086<br>(-0.060, 0.233)    |
| highgrd_c               | 0.003<br>(-0.061, 0.068)                   | 0.005<br>(-0.083, 0.094)     | 0.005<br>(-0.084, 0.093)    | -0.097*<br>(-0.183, -0.011) |
| gender                  | 0.076*<br>(0.018, 0.134)                   | 0.013<br>(-0.068, 0.093)     | -0.025<br>(-0.105, 0.055)   | 0.137*<br>(0.060, 0.215)    |
| Q7_age_c                | 0.001<br>(-0.059, 0.062)                   | -0.004<br>(-0.087, 0.079)    | 0.057<br>(-0.026, 0.139)    | -0.081*<br>(-0.161, -0.001) |
| Neur_c:highgrd_c        | -0.008<br>(-0.127, 0.111)                  | 0.126<br>(-0.035, 0.287)     | 0.129<br>(-0.033, 0.291)    | -0.045<br>(-0.201, 0.111)   |
| Constant                | 0.651*<br>(0.591, 0.710)                   | -0.005<br>(-0.087, 0.077)    | -0.029<br>(-0.111, 0.053)   | -0.012<br>(-0.091, 0.068)   |
| Observations            | 590                                        | 586                          | 592                         | 593                         |
| R <sup>2</sup>          |                                            | 0.007                        | 0.011                       | 0.041                       |
| Adjusted R <sup>2</sup> |                                            | -0.001                       | 0.002                       | 0.032                       |
| Log Likelihood          | -899.981                                   |                              |                             |                             |
| $\theta$                | 45,751.350 (274,227.200)                   |                              |                             |                             |
| Akaike Inf. Crit.       | 1,811.962                                  |                              |                             |                             |
| Residual Std. Error     |                                            | 0.989 (df = 580)             | 0.987 (df = 586)            | 0.958 (df = 587)            |
| F Statistic             |                                            | 0.830 (df = 5; 580)          | 1.293 (df = 5; 586)         | 4.956* (df = 5; 587)        |

Note:

\*  $p < .05$

Table 33: Interaction of socioeconomic status and sesoticism predicting healthy behaviors

### 8.3 Regression estimates - Clinic outcomes

```

edu.blsg <- lm(BloodSugar ~ Neur_c*highgrd_c + gender + clinic1_age_c,
  data = ori.health)
edu.ratio <- lm(ChoHDLratio ~ Neur_c*highgrd_c + gender + clinic1_age_c,
  data = ori.health)
edu.bp <- lm(SysBP ~ Neur_c*highgrd_c + gender + clinic1_age_c,
  data = ori.health)
edu.wh <- lm(WaistHip ~ Neur_c*highgrd_c + gender + clinic1_age_c,
  data = ori.health)

```



|                         | <i>Dependent variable:</i>  |                             |                             |                             |
|-------------------------|-----------------------------|-----------------------------|-----------------------------|-----------------------------|
|                         | BloodSugar                  | ChoHDLratio                 | SysBP                       | WaistHip                    |
|                         | (1)                         | (2)                         | (3)                         | (4)                         |
| Neur_c                  | 0.104<br>(-0.038, 0.246)    | -0.022<br>(-0.179, 0.135)   | -0.023<br>(-0.167, 0.121)   | 0.131*<br>(0.015, 0.247)    |
| highgrd_c               | -0.130*<br>(-0.210, -0.051) | -0.130*<br>(-0.218, -0.043) | -0.119*<br>(-0.199, -0.039) | -0.143*<br>(-0.207, -0.078) |
| gender                  | 0.144*<br>(0.068, 0.220)    | 0.270*<br>(0.186, 0.354)    | 0.160*<br>(0.084, 0.236)    | 0.689*<br>(0.628, 0.750)    |
| clinic1_age_c           | 0.035<br>(-0.045, 0.115)    | 0.045<br>(-0.043, 0.134)    | -0.002<br>(-0.083, 0.078)   | 0.122*<br>(0.057, 0.187)    |
| Neur_c:highgrd_c        | -0.046<br>(-0.193, 0.101)   | 0.044<br>(-0.119, 0.207)    | 0.126<br>(-0.024, 0.276)    | 0.053<br>(-0.068, 0.174)    |
| Constant                | -0.018<br>(-0.096, 0.060)   | 0.010<br>(-0.076, 0.096)    | -0.031<br>(-0.109, 0.047)   | 0.039<br>(-0.024, 0.102)    |
| Observations            | 547                         | 546                         | 578                         | 576                         |
| R <sup>2</sup>          | 0.052                       | 0.084                       | 0.046                       | 0.484                       |
| Adjusted R <sup>2</sup> | 0.043                       | 0.075                       | 0.038                       | 0.479                       |
| Residual Std. Error     | 0.905 (df = 541)            | 1.001 (df = 540)            | 0.930 (df = 572)            | 0.748 (df = 570)            |
| F Statistic             | 5.953* (df = 5; 541)        | 9.865* (df = 5; 540)        | 5.562* (df = 5; 572)        | 106.927* (df = 5; 570)      |

*Note:* \*  $p < .05$

Table 34: Interaction of socioeconomic status and neuroticism predicting clinic measures

## 9 Analyses: Neuroticism by situation (Childhood SES)

### 9.1 Regression estimates - SRH and Outcomes

```

childses.srh <- lm(SelfRatedHealth ~ ChildNeur*childses + gender + Q6_age_c,
  data = ori.health)
childses.heart <- glm(HeartCondition ~ ChildNeur*childses + gender + Q6_age_c,
  data = ori.health,
  family = "binomial")
childses.cond <- glm(NumberChronic ~ ChildNeur*childses + gender + Q6_age_c,
  data = ori.health,
  family = "poisson")

```

### 9.2 Regression estimates - Behavior

```

childses.cige <- glm(Cigarettes_Ever ~ ChildNeur*childses + gender + Q6_age_c,
  data = ori.health,
  family = "binomial")
childses.cig <- glm.nb(Cigarettes ~ ChildNeur*childses + gender + Q6_age_c,
  data = ori.health)
childses.alce <- glm(Alcohol_Ever ~ ChildNeur*childses + gender + Q6_age_c,
  data = ori.health,
  family = "binomial")
childses.alcy <- glm.nb(Alcohol_Days ~ ChildNeur*childses + gender + Q6_age_c,
  data = ori.health)
childses.alck <- glm.nb(Alcohol_Drinks ~ ChildNeur*childses + gender + Q6_age_c,
  data = ori.health)
childses.alcb <- glm.nb(Alcohol_Binge ~ ChildNeur*childses + gender + Q6_age_c,
  data = ori.health)

```

|                         | <i>Dependent variable:</i>  |                             |                             |
|-------------------------|-----------------------------|-----------------------------|-----------------------------|
|                         | SelfRatedHealth             | HeartCondition              | NumberChronic               |
|                         | <i>OLS</i>                  | <i>logistic</i>             | <i>Poisson</i>              |
|                         | (1)                         | (2)                         | (3)                         |
| ChildNeur               | -0.089*<br>(-0.161, -0.017) | -0.001<br>(-0.237, 0.236)   | 0.087<br>(-0.005, 0.178)    |
| childsesc               | 0.286*<br>(0.195, 0.378)    | -0.310*<br>(-0.609, -0.011) | -0.161*<br>(-0.277, -0.045) |
| gender                  | -0.051<br>(-0.124, 0.021)   | 0.255*<br>(0.023, 0.487)    | -0.067<br>(-0.159, 0.026)   |
| Q6_age_c                | -0.044<br>(-0.116, 0.029)   | 0.291*<br>(0.044, 0.538)    | 0.096*<br>(0.002, 0.191)    |
| ChildNeur:childsesc     | -0.046<br>(-0.134, 0.042)   | -0.080<br>(-0.372, 0.212)   | 0.041<br>(-0.071, 0.154)    |
| Constant                | 0.032<br>(-0.040, 0.104)    | -1.984*<br>(-2.222, -1.746) | -0.404*<br>(-0.497, -0.311) |
| Observations            | 681                         | 679                         | 685                         |
| R <sup>2</sup>          | 0.064                       |                             |                             |
| Adjusted R <sup>2</sup> | 0.057                       |                             |                             |
| Log Likelihood          |                             | -251.356                    | -765.378                    |
| Akaike Inf. Crit.       |                             | 514.713                     | 1,542.755                   |
| Residual Std. Error     | 0.956 (df = 675)            |                             |                             |
| F Statistic             | 9.165* (df = 5; 675)        |                             |                             |

Note:

\*  $p < .05$

Table 35: Interaction of socioeconomic status and neuroticism predicting self-rated health and outcomes

|                     | <i>Dependent variable:</i>                |                                               |                                        |                                                 |                                                   |                                                  |
|---------------------|-------------------------------------------|-----------------------------------------------|----------------------------------------|-------------------------------------------------|---------------------------------------------------|--------------------------------------------------|
|                     | Cigarettes_Ever<br><i>logistic</i><br>(1) | Cigarettes<br><i>negative binomial</i><br>(2) | Alcohol_Ever<br><i>logistic</i><br>(3) | Alcohol_Days<br><i>negative binomial</i><br>(4) | Alcohol_Drinks<br><i>negative binomial</i><br>(5) | Alcohol_Binge<br><i>negative binomial</i><br>(6) |
| ChildNeur           | 0.084<br>(-0.069, 0.237)                  | 0.116<br>(-0.145, 0.377)                      | -0.093<br>(-0.306, 0.120)              | -0.007<br>(-0.108, 0.095)                       | -0.008<br>(-0.104, 0.087)                         | 0.061<br>(-0.183, 0.304)                         |
| childsesc           | -0.235*<br>(-0.430, -0.040)               | -0.532*<br>(-0.867, -0.198)                   | -0.150<br>(-0.424, 0.124)              | 0.230*<br>(0.101, 0.359)                        | 0.016<br>(-0.106, 0.138)                          | -0.020<br>(-0.330, 0.291)                        |
| gender              | 0.133<br>(-0.020, 0.287)                  | 0.275*<br>(0.015, 0.534)                      | 0.133<br>(-0.089, 0.355)               | 0.133*<br>(0.031, 0.235)                        | 0.312*<br>(0.215, 0.408)                          | 0.678*<br>(0.432, 0.924)                         |
| Q6_age_c            | 0.069<br>(-0.086, 0.224)                  | -0.028<br>(-0.295, 0.238)                     | 0.247*<br>(0.030, 0.463)               | 0.003<br>(-0.099, 0.105)                        | -0.040<br>(-0.137, 0.057)                         | -0.104<br>(-0.351, 0.143)                        |
| ChildNeur:childsesc | 0.165<br>(-0.026, 0.355)                  | 0.284<br>(-0.038, 0.606)                      | -0.082<br>(-0.343, 0.179)              | -0.075<br>(-0.200, 0.050)                       | -0.052<br>(-0.170, 0.065)                         | 0.084<br>(-0.215, 0.383)                         |
| Constant            | -0.109<br>(-0.261, 0.043)                 | -1.246*<br>(-1.507, -0.984)                   | 1.764*<br>(1.540, 1.987)               | 0.535*<br>(0.433, 0.636)                        | 0.206*<br>(0.109, 0.302)                          | -0.742*<br>(-0.988, -0.497)                      |
| Observations        | 682                                       | 683                                           | 646                                    | 680                                             | 678                                               | 680                                              |
| Log Likelihood      | -465.284                                  | -433.625                                      | -270.441                               | -1,209.293                                      | -1,037.123                                        | -552.068                                         |
| $\theta$            |                                           | 0.125* (0.021)                                |                                        | 0.821* (0.086)                                  | 1.281* (0.172)                                    | 0.124* (0.017)                                   |
| Akaike Inf. Crit.   | 942.569                                   | 879.251                                       | 552.883                                | 2,430.585                                       | 2,086.247                                         | 1,116.136                                        |

Note:

\*  $p < .05$

Table 36: Interaction of socioeconomic status and neuroticism predicting unhealthy behaviors

```

childses.exst <- glm.nb(Exercise_Stren ~ ChildNeur*childses + gender + Q7_age_c,
  data = ori.health)
childses.exmr <- lm(Exercise_Moder ~ ChildNeur*childses + gender + Q7_age_c,
  data = ori.health)
childses.exml <- lm(Exercise_Mild ~ ChildNeur*childses + gender + Q7_age_c,
  data = ori.health)
childses.floss <- lm(Flossing ~ ChildNeur*childses + gender + Q7_age_c,
  data = ori.health)

```

|                         | <i>Dependent variable:</i>                     |                              |                             |                             |
|-------------------------|------------------------------------------------|------------------------------|-----------------------------|-----------------------------|
|                         | Exercise_Stren<br><i>negative<br/>binomial</i> | Exercise_Moder<br><i>OLS</i> | Exercise_Mild<br><i>OLS</i> | Flossing<br><i>OLS</i>      |
|                         | (1)                                            | (2)                          | (3)                         | (4)                         |
| ChildNeur               | 0.0002<br>(-0.053, 0.053)                      | -0.013<br>(-0.088, 0.062)    | 0.010<br>(-0.064, 0.084)    | -0.022<br>(-0.095, 0.051)   |
| childses                | 0.003<br>(-0.063, 0.068)                       | 0.071<br>(-0.020, 0.163)     | 0.076<br>(-0.015, 0.167)    | -0.129*<br>(-0.218, -0.039) |
| gender                  | 0.077*<br>(0.023, 0.130)                       | -0.015<br>(-0.090, 0.061)    | -0.009<br>(-0.084, 0.066)   | 0.167*<br>(0.094, 0.241)    |
| Q7_age_c                | -0.012<br>(-0.066, 0.042)                      | -0.011<br>(-0.087, 0.065)    | 0.051<br>(-0.024, 0.126)    | -0.068<br>(-0.143, 0.006)   |
| ChildNeur:childses      | -0.060<br>(-0.124, 0.005)                      | -0.062<br>(-0.153, 0.029)    | -0.040<br>(-0.130, 0.050)   | 0.065<br>(-0.023, 0.154)    |
| Constant                | 0.686*<br>(0.633, 0.739)                       | -0.007<br>(-0.082, 0.068)    | -0.026<br>(-0.100, 0.048)   | 0.002<br>(-0.071, 0.074)    |
| Observations            | 690                                            | 683                          | 691                         | 693                         |
| R <sup>2</sup>          |                                                | 0.007                        | 0.009                       | 0.050                       |
| Adjusted R <sup>2</sup> |                                                | -0.0004                      | 0.002                       | 0.043                       |
| Log Likelihood          | -1,069.463                                     |                              |                             |                             |
| $\theta$                | 44,893.040 (250,561.300)                       |                              |                             |                             |
| Akaike Inf. Crit.       | 2,150.927                                      |                              |                             |                             |
| Residual Std. Error     |                                                | 0.994 (df = 677)             | 0.987 (df = 685)            | 0.973 (df = 687)            |
| F Statistic             |                                                | 0.948 (df = 5; 677)          | 1.277 (df = 5; 685)         | 7.190* (df = 5; 687)        |

Note:

\*  $p < .05$

Table 37: Interaction of socioeconomic status and childsesoticism predicting healthy behaviors

### 9.3 Regression estimates - Clinic outcomes

```

childses.blsg <- lm(BloodSugar ~ ChildNeur*childses + gender + clinic1_age_c,
  data = ori.health)
childses.ratio <- lm(ChoHDLratio ~ ChildNeur*childses + gender + clinic1_age_c,
  data = ori.health)
childses.bp <- lm(SysBP ~ ChildNeur*childses + gender + clinic1_age_c,
  data = ori.health)
childses.wh <- lm(WaistHip ~ ChildNeur*childses + gender + clinic1_age_c,
  data = ori.health)

```

```

pdf("plots/int_childses_ratio.pdf")
sjp.int(childses.ratio, type="eff", mdrt.values = "meansd",
  legend.labels = c("-1SD", "Mean", "+1SD"), show.ci = T,

```

|                         | <i>Dependent variable:</i>  |                            |                             |                             |
|-------------------------|-----------------------------|----------------------------|-----------------------------|-----------------------------|
|                         | BloodSugar<br>(1)           | ChoHDLratio<br>(2)         | SysBP<br>(3)                | WaistHip<br>(4)             |
| ChildNeur               | -0.024<br>(-0.100, 0.053)   | -0.019<br>(-0.098, 0.060)  | 0.034<br>(-0.039, 0.108)    | -0.001<br>(-0.060, 0.057)   |
| childsesc               | -0.150*<br>(-0.239, -0.062) | -0.052<br>(-0.143, 0.040)  | -0.088*<br>(-0.174, -0.002) | -0.114*<br>(-0.183, -0.046) |
| gender                  | 0.119*<br>(0.044, 0.193)    | 0.255*<br>(0.178, 0.332)   | 0.163*<br>(0.090, 0.235)    | 0.659*<br>(0.601, 0.716)    |
| clinic1_age_c           | 0.064<br>(-0.013, 0.140)    | 0.012<br>(-0.067, 0.091)   | 0.004<br>(-0.071, 0.079)    | 0.114*<br>(0.055, 0.174)    |
| ChildNeur:childsesc     | 0.035<br>(-0.056, 0.126)    | -0.0004<br>(-0.094, 0.093) | 0.057<br>(-0.031, 0.144)    | 0.043<br>(-0.027, 0.113)    |
| Constant                | -0.031<br>(-0.105, 0.043)   | -0.024<br>(-0.101, 0.052)  | -0.043<br>(-0.115, 0.029)   | -0.007<br>(-0.064, 0.051)   |
| Observations            | 638                         | 636                        | 677                         | 675                         |
| R <sup>2</sup>          | 0.039                       | 0.067                      | 0.036                       | 0.448                       |
| Adjusted R <sup>2</sup> | 0.031                       | 0.060                      | 0.029                       | 0.443                       |
| Residual Std. Error     | 0.950 (df = 632)            | 0.980 (df = 630)           | 0.948 (df = 671)            | 0.755 (df = 669)            |
| F Statistic             | 5.126* (df = 5; 632)        | 9.102* (df = 5; 630)       | 5.022* (df = 5; 671)        | 108.421* (df = 5; 669)      |

*Note:* \*  $p < .05$

Table 38: Interaction of socioeconomic status and neuroticism predicting clinic measures

```

axis.title = "Child neuroticism", legend.title = "Child SES",
title = "Interaction of child SES and neuroticism on adult cholesterol-HDL ratio")
dev.off()

## pdf
## 2

```

## 10 Analyses: Neuroticism by situation (health problems)

### 10.1 Regression estimates - SRH and Outcomes

```

health.srh <- lm(SelfRatedHealth ~ Neur_c*Chronic + gender + Q6_age_c,
data = ori.health)

```

### 10.2 Regression estimates - Behavior

```

health.cige <- glm(Cigarettes_Ever ~ Neur_c*Chronic + gender + Q6_age_c,
data = ori.health,
family = "binomial")
health.cig <- glm.nb(Cigarettes ~ Neur_c*Chronic + gender + Q6_age_c,
data = ori.health)
health.alce <- glm(Alcohol_Ever ~ Neur_c*Chronic + gender + Q6_age_c,
data = ori.health,

```

|                         | <i>Dependent variable:</i>  |
|-------------------------|-----------------------------|
|                         | SelfRatedHealth             |
| Neur_c                  | -0.472*<br>(-0.655, -0.290) |
| Chronic                 | -0.465*<br>(-0.611, -0.320) |
| gender                  | -0.073*<br>(-0.146, -0.001) |
| Q6_age_c                | 0.015<br>(-0.057, 0.087)    |
| Neur_c:Chronic          | -0.148<br>(-0.412, 0.115)   |
| Constant                | 0.259*<br>(0.160, 0.357)    |
| Observations            | 587                         |
| R <sup>2</sup>          | 0.172                       |
| Adjusted R <sup>2</sup> | 0.165                       |
| Residual Std. Error     | 0.884 (df = 581)            |
| F Statistic             | 24.190* (df = 5; 581)       |
| <i>Note:</i>            | * $p < .05$                 |

Table 39: Interaction of health and neuroticism predicting self-rated health

```

family = "binomial")
health.alcy <- glm.nb(Alcohol_Days ~ Neur_c*Chronic + gender + Q6_age_c,
  data = ori.health)
health.alck <- glm.nb(Alcohol_Drinks ~ Neur_c*Chronic + gender + Q6_age_c,
  data = ori.health)
health.alcb <- glm.nb(Alcohol_Binge ~ Neur_c*Chronic + gender + Q6_age_c,
  data = ori.health)

```

```

health.exst <- glm.nb(Exercise_Stren ~ Neur_c*Chronic + gender + Q7_age_c,
  data = ori.health)
health.exmr <- lm(Exercise_Moder ~ Neur_c*Chronic + gender + Q7_age_c,
  data = ori.health)
health.exml <- lm(Exercise_Mild ~ Neur_c*Chronic + gender + Q7_age_c,
  data = ori.health)
health.floss <- lm(Flossing ~ Neur_c*Chronic + gender + Q7_age_c,
  data = ori.health)

```

### 10.3 Regression estimates - Clinic outcomes

```

health.blsg <- lm(BloodSugar ~ Neur_c*Chronic + gender + clinic1_age_c,
  data = ori.health)
health.ratio <- lm(ChoHDLratio ~ Neur_c*Chronic + gender + clinic1_age_c,
  data = ori.health)
health.bp <- lm(SysBP ~ Neur_c*Chronic + gender + clinic1_age_c,
  data = ori.health)
health.wh <- lm(WaistHip ~ Neur_c*Chronic + gender + clinic1_age_c,
  data = ori.health)

```

```

#save environment so models can be used to create graphics
save(list=ls(), file="HealthyNModels.Rdata")

```

|                   | <i>Dependent variable:</i>                |                                               |                                        |                                                 |                                                   |                                                  |
|-------------------|-------------------------------------------|-----------------------------------------------|----------------------------------------|-------------------------------------------------|---------------------------------------------------|--------------------------------------------------|
|                   | Cigarettes_Ever<br><i>logistic</i><br>(1) | Cigarettes<br><i>negative binomial</i><br>(2) | Alcohol_Ever<br><i>logistic</i><br>(3) | Alcohol_Days<br><i>negative binomial</i><br>(4) | Alcohol_Drinks<br><i>negative binomial</i><br>(5) | Alcohol_Binge<br><i>negative binomial</i><br>(6) |
| Neur_c            | 0.112<br>(-0.302, 0.527)                  | 0.237<br>(-0.545, 1.018)                      | -0.164<br>(-0.790, 0.461)              | -0.014<br>(-0.282, 0.255)                       | 0.048<br>(-0.198, 0.294)                          | 0.448<br>(-0.203, 1.099)                         |
| Chronic           | 0.148<br>(-0.182, 0.477)                  | 0.366<br>(-0.244, 0.977)                      | -0.410<br>(-0.897, 0.076)              | -0.320*<br>(-0.538, -0.102)                     | -0.281*<br>(-0.484, -0.078)                       | -0.384<br>(-0.916, 0.149)                        |
| gender            | 0.091<br>(-0.073, 0.255)                  | 0.119<br>(-0.183, 0.421)                      | 0.172<br>(-0.072, 0.416)               | 0.093<br>(-0.014, 0.201)                        | 0.305*<br>(0.205, 0.405)                          | 0.713*<br>(0.450, 0.976)                         |
| Q6_age_c          | 0.041<br>(-0.122, 0.205)                  | -0.123<br>(-0.425, 0.180)                     | 0.231<br>(-0.006, 0.467)               | 0.032<br>(-0.076, 0.140)                        | -0.028<br>(-0.128, 0.073)                         | -0.139<br>(-0.402, 0.125)                        |
| Neur_c:Chronic    | 0.256<br>(-0.346, 0.857)                  | 0.621<br>(-0.480, 1.721)                      | 1.275*<br>(0.375, 2.174)               | 0.060<br>(-0.336, 0.456)                        | 0.169<br>(-0.199, 0.537)                          | 0.285<br>(-0.676, 1.245)                         |
| Constant          | -0.124<br>(-0.347, 0.100)                 | -1.525*<br>(-1.948, -1.102)                   | 1.999*<br>(1.647, 2.350)               | 0.699*<br>(0.554, 0.843)                        | 0.339*<br>(0.207, 0.472)                          | -0.659*<br>(-1.010, -0.307)                      |
| Observations      | 588                                       | 588                                           | 558                                    | 583                                             | 583                                               | 584                                              |
| Log Likelihood    | -404.687                                  | -337.032                                      | -225.639                               | -1,045.708                                      | -891.232                                          | -460.515                                         |
| $\theta$          |                                           | 0.103* (0.020)                                |                                        | 0.867* (0.099)                                  | 1.500* (0.231)                                    | 0.133* (0.020)                                   |
| Akaike Inf. Crit. | 821.374                                   | 686.065                                       | 463.279                                | 2,103.416                                       | 1,794.465                                         | 933.031                                          |

Note:

\*  $p < .05$

Table 40: Interaction of health status and neuroticism predicting unhealthy behaviors

|                         | <i>Dependent variable:</i>                     |                              |                             |                             |
|-------------------------|------------------------------------------------|------------------------------|-----------------------------|-----------------------------|
|                         | Exercise_Stren<br><i>negative<br/>binomial</i> | Exercise_Moder<br><i>OLS</i> | Exercise_Mild<br><i>OLS</i> | Flossing<br><i>OLS</i>      |
|                         | (1)                                            | (2)                          | (3)                         | (4)                         |
| Neur_c                  | -0.071<br>(-0.218, 0.077)                      | -0.033<br>(-0.239, 0.174)    | 0.038<br>(-0.166, 0.242)    | 0.106<br>(-0.091, 0.302)    |
| Chronic                 | -0.074<br>(-0.197, 0.049)                      | -0.167<br>(-0.337, 0.004)    | 0.041<br>(-0.127, 0.210)    | 0.151<br>(-0.011, 0.313)    |
| gender                  | 0.067*<br>(0.006, 0.127)                       | 0.003<br>(-0.081, 0.088)     | -0.032<br>(-0.116, 0.051)   | 0.171*<br>(0.090, 0.251)    |
| Q7_age_c                | 0.001<br>(-0.059, 0.062)                       | -0.006<br>(-0.091, 0.079)    | 0.051<br>(-0.032, 0.135)    | -0.122*<br>(-0.203, -0.041) |
| Neur_c:Chronic          | -0.049<br>(-0.278, 0.180)                      | -0.071<br>(-0.383, 0.240)    | -0.279<br>(-0.590, 0.033)   | 0.024<br>(-0.274, 0.322)    |
| Constant                | 0.692*<br>(0.611, 0.773)                       | 0.082<br>(-0.032, 0.196)     | -0.054<br>(-0.167, 0.058)   | -0.095<br>(-0.204, 0.013)   |
| Observations            | 547                                            | 543                          | 549                         | 550                         |
| R <sup>2</sup>          |                                                | 0.009                        | 0.011                       | 0.051                       |
| Adjusted R <sup>2</sup> |                                                | -0.00001                     | 0.002                       | 0.042                       |
| Log Likelihood          | -833.382                                       |                              |                             |                             |
| $\theta$                | 48,270.160 (300,272.200)                       |                              |                             |                             |
| Akaike Inf. Crit.       | 1,678.764                                      |                              |                             |                             |
| Residual Std. Error     |                                                | 0.995 (df = 537)             | 0.988 (df = 543)            | 0.954 (df = 544)            |
| F Statistic             |                                                | 0.999 (df = 5; 537)          | 1.259 (df = 5; 543)         | 5.840* (df = 5; 544)        |

Note:

\*  $p < .05$

Table 41: Interaction of health status and healthtoticism predicting healthy behaviors



|                         | <i>Dependent variable:</i>  |                           |                             |                             |
|-------------------------|-----------------------------|---------------------------|-----------------------------|-----------------------------|
|                         | BloodSugar                  | ChoHDLratio               | SysBP                       | WaistHip                    |
|                         | (1)                         | (2)                       | (3)                         | (4)                         |
| Neur_c                  | 0.013<br>(-0.201, 0.228)    | 0.039<br>(-0.198, 0.275)  | -0.024<br>(-0.236, 0.188)   | 0.073<br>(-0.097, 0.242)    |
| Chronic                 | 0.462*<br>(0.295, 0.629)    | 0.134<br>(-0.049, 0.318)  | 0.318*<br>(0.156, 0.480)    | 0.411*<br>(0.282, 0.541)    |
| gender                  | 0.187*<br>(0.104, 0.269)    | 0.276*<br>(0.185, 0.367)  | 0.195*<br>(0.115, 0.276)    | 0.706*<br>(0.642, 0.771)    |
| clinic1_age_c           | -0.001<br>(-0.089, 0.086)   | 0.051<br>(-0.045, 0.148)  | -0.023<br>(-0.109, 0.064)   | 0.084*<br>(0.015, 0.153)    |
| Neur_c:Chronic          | 0.186<br>(-0.114, 0.486)    | 0.046<br>(-0.284, 0.376)  | 0.063<br>(-0.232, 0.357)    | 0.143<br>(-0.094, 0.379)    |
| Constant                | -0.235*<br>(-0.350, -0.119) | -0.058<br>(-0.186, 0.069) | -0.187*<br>(-0.299, -0.075) | -0.184*<br>(-0.274, -0.094) |
| Observations            | 485                         | 484                       | 510                         | 508                         |
| R <sup>2</sup>          | 0.096                       | 0.075                     | 0.065                       | 0.503                       |
| Adjusted R <sup>2</sup> | 0.087                       | 0.065                     | 0.056                       | 0.498                       |
| Residual Std. Error     | 0.924 (df = 479)            | 1.017 (df = 478)          | 0.921 (df = 504)            | 0.734 (df = 502)            |
| F Statistic             | 10.177* (df = 5; 479)       | 7.729* (df = 5; 478)      | 7.023* (df = 5; 504)        | 101.435* (df = 5; 502)      |

*Note:* \*  $p < .05$

Table 42: Interaction of health status and neuroticism predicting clinic measures

## Bibliography

- R-memiscElff, M. 2016. memisc: Tools for Management of Survey Data and the Presentation of Analysis Results memisc: Tools for management of survey data and the presentation of analysis results []. <https://CRAN.R-project.org/package=memisc> R package version 0.99.8
- R-stargazerHlavac, M. 2015. stargazer: Well-Formatted Regression and Summary Statistics Tables stargazer: Well-formatted regression and summary statistics tables []. <https://CRAN.R-project.org/package=stargazer> R package version 5.2
- R-sjPlotLdecke, D. 2017. sjPlot: Data Visualization for Statistics in Social Science sjplot: Data visualization for statistics in social science []. <https://CRAN.R-project.org/package=sjPlot> R package version 2.4.0
- R-foreignR Core Team. 2017. foreign: Read Data Stored by 'Minitab', 'S', 'SAS', 'SPSS', 'Stata', 'Systat', 'Weka', 'dBase', ... foreign: Read data stored by 'minitab', 's', 'sas', 'spss', 'stata', 'systat', 'weka', 'dbase', ... []. <https://CRAN.R-project.org/package=foreign> R package version 0.8-69
- R-psychRevelle, W. 2017. psych: Procedures for Psychological, Psychometric, and Personality Research psych: Procedures for psychological, psychometric, and personality research []. <https://CRAN.R-project.org/package=psych> R package version 1.7.8
- R-MASSRipley, B. 2017. MASS: Support Functions and Datasets for Venables and Ripley's MASS Mass: Support functions and datasets for venables and ripley's mass []. <https://CRAN.R-project.org/package=MASS> R package version 7.3-47
- R-lavaanRosseel, Y. 2017. lavaan: Latent Variable Analysis lavaan: Latent variable analysis []. <https://CRAN.R-project.org/package=lavaan> R package version 0.5-23.1097

R-tidyverse Wickham, H. 2017. tidyverse: Easily Install and Load 'Tidyverse' Packages tidyverse: Easily install and load 'tidyverse' packages []. <https://CRAN.R-project.org/package=tidyverse> R package version 1.1.1

R-haven Wickham, H. Miller, E. 2017. haven: Import and Export 'SPSS', 'Stata' and 'SAS' Files haven: Import and export 'spss', 'stata' and 'sas' files []. <https://CRAN.R-project.org/package=haven> R package version 1.1.0
